## RESEARCH ARTICLE

# Electronic cigarette use during pregnancy and the risk of adverse birth outcomes: A cross-sectional surveillance study of the US Pregnancy Risk Assessment Monitoring System (PRAMS) population

Lin Ammar<sup>1</sup>, Hilary A. Tindle<sup>2,3,4</sup>, Angela M. Miller<sup>5</sup>, Margaret A. Adgent<sup>6</sup>, Hui Nian<sup>7</sup>, Kelli K. Ryckman<sup>8,9</sup>, Mulubrhan Mogos<sup>10</sup>, Mariann R. Piano<sup>10</sup>, Ethan Xie<sup>2</sup>, Brittney M. Snyder<sup>2</sup>, Abhismitha Ramesh<sup>9</sup>, Chang Yu<sup>11</sup>, Tina V. Hartert<sup>2,12</sup>, Pingsheng Wu<sup>2,7\*</sup>

**1** Vanderbilt University School of Medicine, Nashville, Tennessee, United States of America, **2** Department of Medicine, Vanderbilt University Medical Center, Nashville, Tennessee, United States of America, **3** The Vanderbilt Center for Tobacco, Addiction and Lifestyle, Vanderbilt University Medical Center, Nashville, Tennessee, United States of America, **4** Geriatric Research Education and Clinical Centers, Veterans Affairs Tennessee Valley Healthcare System, Nashville, Tennessee, United States of America, **5** Division of Population Health Assessment, Tennessee Department of Health, Nashville, Tennessee, United States of America, **6** Department of Health Policy, Vanderbilt University Medical Center, Nashville, Tennessee, United States of America, **7** Department of Biostatistics, Vanderbilt University Medical Center, Nashville, Tennessee, United States of America, **8** Department of Epidemiology and Biostatistics, Indiana University School of Public Health—Bloomington, Bloomington, IN, United States of America, **9** Department of Epidemiology, University of Iowa, Iowa City, IA, United States of America, **10** Vanderbilt University School of Nursing, Nashville, Tennessee, United States of America, **11** Division of Biostatistics, Department of Population Health, New York University Langone Health, New York University Grossman School of Medicine, New York, New York, United States of America, **12** Department of Pediatrics, Vanderbilt University Medical Center, Nashville, Tennessee, United States of America

\* [pingsheng.wu@vumc.org](mailto:pingsheng.wu@vumc.org)

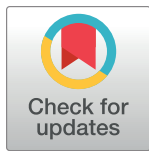

## OPEN ACCESS

**Citation:** Ammar L, Tindle HA, Miller AM, Adgent MA, Nian H, Ryckman KK, et al. (2023) Electronic cigarette use during pregnancy and the risk of adverse birth outcomes: A cross-sectional surveillance study of the US Pregnancy Risk Assessment Monitoring System (PRAMS) population. *PLoS ONE* 18(10): e0287348. <https://doi.org/10.1371/journal.pone.0287348>

**Editor:** Emily W. Harville, Tulane University School of Public Health and Tropical Medicine, UNITED STATES

**Received:** March 10, 2023

**Accepted:** June 2, 2023

**Published:** October 24, 2023

**Copyright:** © 2023 Ammar et al. This is an open access article distributed under the terms of the [Creative Commons Attribution License](https://creativecommons.org/licenses/by/4.0/), which permits unrestricted use, distribution, and reproduction in any medium, provided the original author and source are credited.

**Data Availability Statement:** The data underlying the results presented in the study are available from the CDC Pregnancy Risk Assessment Monitoring System (<https://www.cdc.gov/prams/prams-data/researchers.htm>).

**Funding:** This research was supported by grants from the National Institute of Drug Abuse (<https://nida.nih.gov/>) to P.W. (R21 DA052026), the Eunice

## Abstract

### Background

Research on health effects and potential harms of electronic cigarette (EC) use during pregnancy is limited. We sought to determine the risks of pregnancy EC use on pregnancy-related adverse birth outcomes and assess whether quitting ECs reduces the risks.

### Methods

Women with singleton live births who participated in the US Pregnancy Risk Assessment Monitoring System (PRAMS) survey study 2016–2020 were classified into four mutually exclusive groups, by their use of ECs and combustible cigarettes (CCs) during pregnancy: non-use, EC only use, CC only use, and dual use. We determined the risk of preterm birth, low birth weight, and small-for-gestational-age (SGA) by comparing cigarette users to non-users with a modified Poisson regression model adjusting for covariates. In a subset of women who all used ECs prior to pregnancy, we determined whether quitting EC use reduces the risk of preterm birth, low birth weight, and SGA by comparing to those who

Kennedy Shriver National Institute of Child Health and Human Development (<https://www.nichd.nih.gov/>) to K.R. (R03 HD100708), the National Heart, Lung, and Blood Institute (<https://www.nhlbi.nih.gov/>) to B.M.S. (K01 HL161257), and the National Center for Advancing Translational Science (<https://ncats.nih.gov/>) Clinical and Translational Science (CTSA) Award to L.A. (TL1 TR002244). H.A.T acknowledges the support of the William Anderson Spickard Jr., M.D., Chair in Medicine at Vanderbilt University. The funders had no role in study design, data collection and analysis, decision to publish, or preparation of the manuscript.

**Competing interests:** The authors have declared that no competing interests exist.

continued its use. All analyses were weighted to account for the PRAMS survey design and non-response rate.

## Results

Of the 190,707 women (weighted N = 10,202,413) included, 92.1% reported cigarette non-use, 0.5% EC only use, 6.7% CC only use, and 0.7% dual use during pregnancy. Compared with non-use, EC only use was associated with a significantly increased risk of preterm birth (adjusted risk ratio [aRR]: 1.29, 95% confidence interval [CI]: 1.00, 1.65) and low birth weight (aRR: 1.38, 95%CI: 1.09, 1.75), but not SGA (aRR: 1.04, 95%CI: 0.76, 1.44). Among 7,877 (weighted N = 422,533) women EC users, quitting use was associated with a significantly reduced risk of low birth weight (aRR: 0.76, 95%CI: 0.62, 0.94) and SGA (aRR: 0.77, 95%CI: 0.62, 0.94) compared to those who continued to use ECs during pregnancy.

## Conclusions

Pregnancy EC use, by itself or dual use with CC, is associated with preterm birth and low birth weight. Quitting use reduces that risk. ECs should not be considered as a safe alternative nor a viable gestational smoking cessation strategy.

## Introduction

Preterm birth and low birth weight are the most common adverse outcomes of pregnancy imposing significant economic and psychological burden on families and society [1–3]. Preterm birth and low birth weight are important causes of perinatal mortality and both short- and long-term infant and childhood morbidity [2, 4]. Decades of research has established maternal smoking during pregnancy as a major risk factor for preterm birth and low birth weight [5–7]. What remains unclear, however, is whether electronic cigarette (EC) use during pregnancy is associated with these adverse birth outcomes [8].

Since their introduction in the U.S. market in 2007, ECs have been marketed as a safer and healthier alternative to combustible cigarettes (CCs) [9]. Women smokers who are pregnant or planning to become pregnant often view ECs as less harmful to the fetus and an option for smoking cessation [10–14]. The U.S. Food and Drug Administration recently authorized the marketing of several electronic nicotine delivery system products, which may be misinterpreted as an endorsement about the safety of these products [15]. The 2022 Cochrane review concluded that nicotine-containing ECs are effective for smoking cessation [16]. However, research on health effects and potential harms of EC use during pregnancy is limited and has been identified as one of the research gaps by the 2021 U.S. Preventive Services Task Force (USPSTF) [8]. While the mechanisms of fetal harm from EC use during pregnancy are not known, they may be mediated via exposure to volatile organic compounds, heavy metals, carcinogens, nicotine, and carrier agents, among others [17]. EC vapor, independent of nicotine, hinders the function of trophoblasts in the placenta leading to complications in placental structuring and could lead to preeclampsia, early miscarriage, premature birth and possibly even maternal or fetal death [18]. Further, instead of switching to complete EC only use, women who use ECs intending to quit smoking may end up using both products (dual use) [9, 14].

The objectives of this study, in direct response to USPSTF call, were to investigate the risk of EC use during pregnancy on adverse birth outcomes of preterm birth, low birth weight, and

small-for-gestational-age (SGA), and to assess whether quitting EC use in pregnancy reduces these health risks. Results can contribute to a critical growing body of knowledge on the health effects of EC use during pregnancy and the benefits of quitting, and will inform the development of clinical guidelines and public health interventions for tobacco control in pregnancy.

## Materials and methods

### Data source

We studied women who had singleton live births between 2016–2020 and participated in the Centers for Diseases Control and Prevention (CDC) Pregnancy Risk Assessment Monitoring System (PRAMS) survey, an ongoing public health surveillance survey of women who have had a recent live birth [19]. PRAMS contacts women 2–6 months post delivery for population-based and site-specific information on maternal attitudes and experiences before, during, and shortly after pregnancy. PRAMS additionally contains a wealth of demographic and medical information through linked birth certificates. Detailed methods regarding the PRAMS study design have been described elsewhere [20]. PRAMS has a minimum overall response rate threshold policy for the release of data for each year. Our analysis included data of a total 195 study-years from 48 sites that met the established response rate threshold criteria (S1 Table). The study is deemed as a secondary data analysis for which consent is not required. We have no access to information that could identify individual participants during or after data collection. The study protocol was approved by the CDC PRAMS Working Group and the Vanderbilt University Institutional Review Board (#191880).

### Tobacco product (EC and CC) use around pregnancy

We focus on tobacco products of EC and CC use around pregnancy. Information regarding women's daily average amount of CC use in the 3 months before pregnancy, the last 3 months of pregnancy, and the 2–6 months post-delivery has been collected since the start of the PRAMS survey in 1988 (S2 Table). PRAMS introduced questions on ECs in the 2016 survey. EC and other electronic nicotine products (such as vape pens, e-hookahs, hookah pens, e-cigars, e-pipes) are defined as battery-powered devices that use nicotine liquid rather than tobacco leaves and produce vapor instead of smoke [19]. Women's frequency of EC use in the 3 months before pregnancy and the last 3 months of pregnancy has been collected (S2 Table).

### Preterm birth, low birth weight, and SGA

The categorical variables of gestational age in weeks ( $\leq 27$ , 28–33, 34–36, 37–42, 43+ weeks), birth weight grouped per 250-gram intervals (0 to 7,000 grams), and SGA at the tenth percentile (birth weight lower than the tenth percentile of the population defined by gestational age in weeks, race/ethnicity, and infant sex) were available in the PRAMS data from the linked birth certificate (27). Our primary outcomes of interest thus included preterm birth (gestational age  $< 37$  weeks), low birth weight ( $< 2,500$  grams), and SGA.

### Covariates

Demographic, behavior, and health-related characteristics captured from the survey or linked birth certificate that are associated with maternal tobacco product use and/or birth outcomes were studied. Covariates included maternal age at delivery ( $\leq 17$ , 18–24, 25–29, 30–34,  $\geq 35$  years), maternal race/ethnicity (non-Hispanic White, non-Hispanic Black, Hispanics, and Other/Unknown), maternal education (some high school education or less, high school graduate, some college education, college graduate or more), marital status (married, other),

household income ( $\leq$ \$20,000, \$20,001-\$40,000, \$40,001-\$85,000,  $\geq$ \$85,001), prenatal participating in the Special Supplemental Nutrition Program for Women, Infants, and Children (WIC) (no, yes), pregnancy intention (intended, unintended, unsure), the Kotelchuck index of prenatal care adequacy (inadequate, intermediate, adequate, adequate plus), commencement of prenatal care in the first trimester (no, yes), parity (primiparous, 2,  $\geq$ 3), history of preterm birth (no, yes), maternal pre-pregnancy body mass index (BMI) (underweight:  $<$ 18.5, normal weight: 18.5–24.9, over weight: 25.0–29.9, obese  $\geq$ 30.0 kg/m<sup>2</sup>), pre-pregnancy multivitamin use frequency per week (never, 1–3 times, 4–6 times, everyday), pre-pregnancy alcoholic drink consumption per week (no,  $<$ 1 drink, 1–7 drinks,  $\geq$ 8 drinks), delivery method (vaginal, assisted, c-section), residency, and year of delivery (2016–2020).

### Study design and analysis

We assessed the risk of pregnancy EC use in two analyses. The first analysis aimed to address the question of whether pregnancy EC use increases the risk of adverse birth outcomes. The analysis included 190,707 (weighted N = 10,202,413) women with live singleton births who reported their EC and CC use in the last three months of pregnancy (study population one). Women were classified into mutually exclusive groups: non-use, EC only use, CC only use, and dual use (Fig 1). A modified Poisson regression was performed to assess the relative risk of preterm birth, low birth weight, and SGA by comparing EC only use, CC only use, and dual

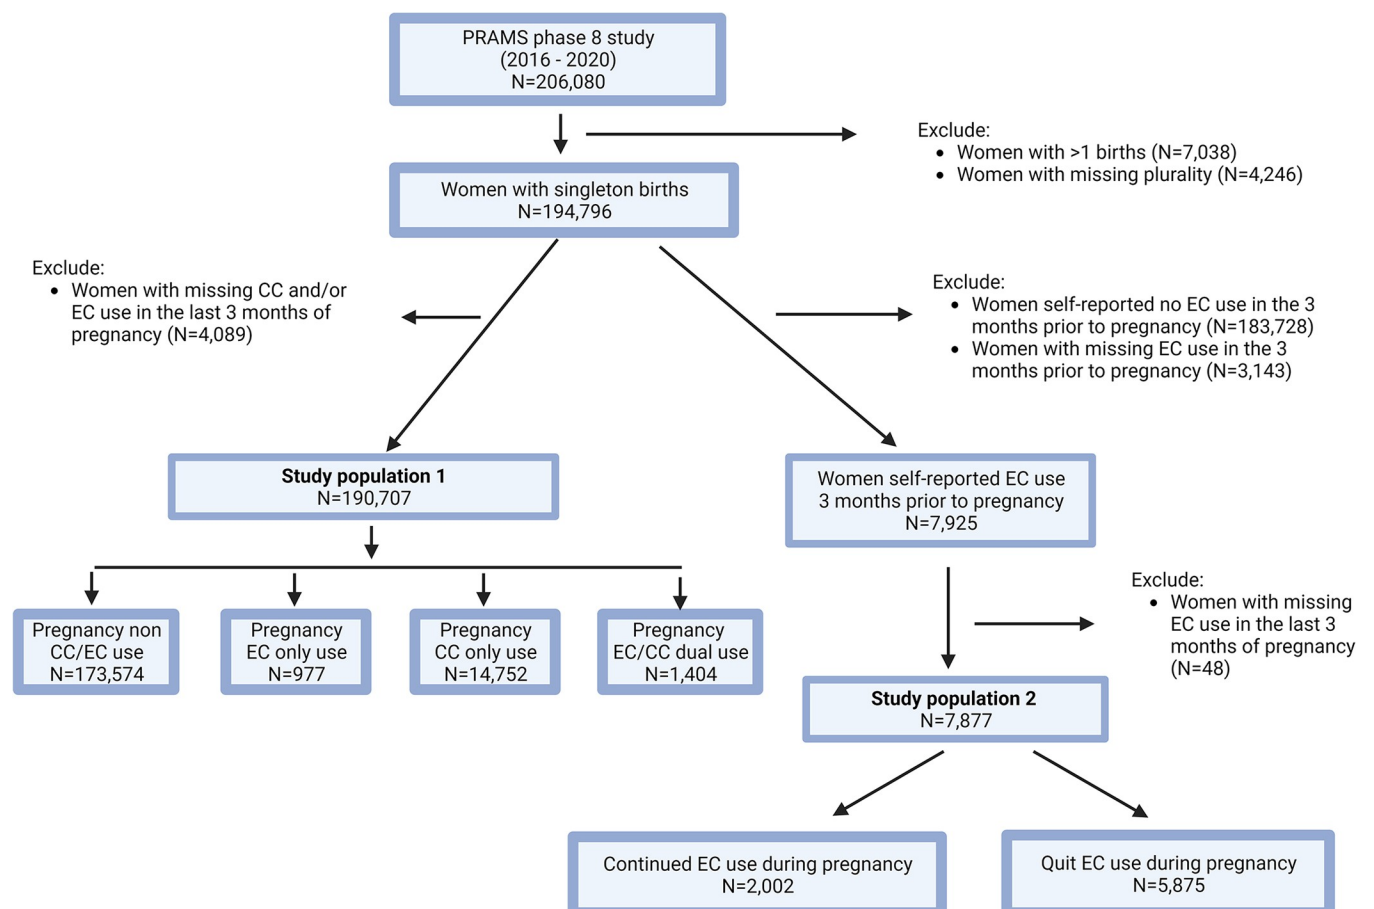

**Fig 1. Flow diagram of the study populations.** Numbers presented are unweighted sample size.

<https://doi.org/10.1371/journal.pone.0287348.g001>

use to non-use adjusting for covariates. As a sensitivity analysis, a proportional odds model was performed with categorical gestational age ( $\leq 27$ , 28–33, 34–36, 37–42, 43+ weeks) and categorical birth weight (extreme low birth weight  $< 1,000$  grams, very low birth weight: 1,000 -  $< 1,500$  grams, low birth weight: 1,500 -  $< 2,500$  grams, normal birth weight:  $\geq 2,500$  grams) as outcomes of interest. To better understand the association between EC use and low birth weight, we assessed the association in 1) a sensitivity analysis additionally adjusting for gestational age, and 2) a subgroup analysis of women who had a term birth ( $\geq 37$  weeks).

The second analysis aimed to answer the question of whether quitting EC use during pregnancy reduces the risk of adverse birth outcomes. The analysis is limited to women who self-reported use of ECs three months prior to pregnancy, regardless of their CC use status (Fig 1, study population two). We excluded women with missing EC use in the last three months of pregnancy. Women EC users (unweighted  $N = 7,877$ , weighted  $N = 422,533$ ) were then classified into those who self-reported continuing EC use and those who reported quitting use during pregnancy (Fig 1). The risk of preterm birth, low birth weight, and SGA between women of continuing use and quitting use was compared using a modified Poisson regression, adjusting for the number of CCs used before and during pregnancy (no use,  $< 10$ , 11–20,  $> 20$ ) as well as the above covariates. The association was further examined in a subset of women who did not use CCs both prior to and during pregnancy.

We implemented a complete case analysis approach in above regression modeling. Subjects missing one or more covariates were dropped from the analysis. As a sensitivity analysis, we performed multiple imputation and repeated all analyses conducted. For each analysis, ten imputed data sets were generated using `aregImpute` function in the `Hmisc` package [21], and the weighted analysis results from each of the ten imputed data sets were combined using `MIcombine` function in the `mitools` package [22].

All analyses were weighted to account for the PRAMS survey design and non-response rate and were performed using STATA software, version 16.1 (StataCorp LLC, College station, Texas) and R software version 4.2.1 [23]. A p-value less than 0.05 was considered statistically significant.

## Results

Of 206,080 women (weighted population 10,630,861) who participated in the 2016–2020 PRAMS survey, we excluded 7,038 women who had multiple births and 4,246 women with missing information on plurality. We further excluded 4,089 women with missing information on EC and/or CC use in the last three months of pregnancy to leave study population one as 190,707 women (weighted  $N = 10,202,413$ ). Study population two included women who self-reported EC use prior to pregnancy, regardless of their status of CC use (unweighted  $N = 7,877$ , weighted  $N = 422,533$ ) (Fig 1).

Table 1 presents the unweighted sample size and the weighted prevalence (95% confidence interval [CI]) of women with a recent live singleton birth stratified by the status of self-reported cigarette use in the last three months of pregnancy. Overall, 92.1% (95%CI: 91.9%, 92.3%) women reported cigarette non-use, 0.5% (95%CI: 0.5%, 0.6%) reported EC only use, 6.7% (95%CI: 6.5%, 6.9%) reported CC only use, and 0.7% (95%CI: 0.6%, 0.8%) reported dual use during the last three months of pregnancy. Fifty-seven percent of women in the weighted sample were non-Hispanic White, 15% were non-Hispanic Black, 19% were Hispanics, and 9% were other race/ethnic categories. Compared with women who were non-users, women who used tobacco products, either ECs and/or CCs, were more likely to be non-Hispanic White, younger in age, less educated and have a lower household income. Women who used ECs and/or CCs were also less likely to be married, have an intended pregnancy, have at least “adequate”

**Table 1. Maternal demographic, behavioral, and health condition related characteristics of women who gave live singleton births in 2016–2020 and participated in the PRAMS survey.**

| Characteristics                                                     | Non-use (N = 173,574) <sup>a</sup> |                        | EC only use (N = 977) <sup>a</sup> |                        | CC only use (N = 14,752) <sup>a</sup> |                        | Dual use (N = 1,404) <sup>a</sup> |                        | Total (N = 190,707) <sup>a</sup> |                        |
|---------------------------------------------------------------------|------------------------------------|------------------------|------------------------------------|------------------------|---------------------------------------|------------------------|-----------------------------------|------------------------|----------------------------------|------------------------|
|                                                                     | No. <sup>a</sup>                   | % (95%CI) <sup>b</sup> | No. <sup>a</sup>                   | % (95%CI) <sup>b</sup> | No. <sup>a</sup>                      | % (95%CI) <sup>b</sup> | No. <sup>a</sup>                  | % (95%CI) <sup>b</sup> | No. <sup>a</sup>                 | % (95%CI) <sup>b</sup> |
| Maternal age at delivery (year)                                     |                                    |                        |                                    |                        |                                       |                        |                                   |                        |                                  |                        |
| ≤24                                                                 | 39,396                             | 22.2 (21.9, 22.5)      | 388                                | 40.7 (35.8, 45.7)      | 4,194                                 | 29.9 (28.7, 31.2)      | 464                               | 34.2 (30.2, 38.5)      | 44,442                           | 22.9 (22.6, 23.2)      |
| 25–29                                                               | 49,640                             | 28.6 (28.3, 29.0)      | 283                                | 24.8 (20.9, 29.1)      | 4,799                                 | 34.1 (32.8, 35.4)      | 439                               | 32.2 (28.2, 36.4)      | 55,161                           | 29.0 (28.7, 29.3)      |
| 30–34                                                               | 51,594                             | 30.1 (29.8, 30.5)      | 194                                | 23.2 (19.2, 27.9)      | 3,649                                 | 23.2 (22.0, 24.3)      | 331                               | 23.5 (20.1, 27.2)      | 55,768                           | 29.6 (29.3, 29.9)      |
| ≥35                                                                 | 32,938                             | 19.0 (18.7, 19.3)      | 111                                | 11.3 (8.6, 14.7)       | 2,109                                 | 12.8 (11.9, 13.7)      | 170                               | 10.2 (8.0, 12.9)       | 35,328                           | 18.5 (18.2, 18.8)      |
| Maternal race/ethnicity                                             |                                    |                        |                                    |                        |                                       |                        |                                   |                        |                                  |                        |
| Non Hispanic White                                                  | 76,485                             | 55.3 (55.0, 55.6)      | 606                                | 78.1 (74.1, 81.6)      | 7,918                                 | 72.6 (71.4, 73.8)      | 966                               | 85.8 (83.1, 88.2)      | 85,975                           | 56.8 (56.5, 57.1)      |
| Non Hispanic Black                                                  | 31,550                             | 15.2 (15.0, 15.5)      | 86                                 | 6.0 (4.2, 8.5)         | 2,733                                 | 14.2 (13.3, 15.2)      | 117                               | 4.0 (2.8, 5.7)         | 34,486                           | 15.1 (14.8, 15.3)      |
| Hispanic                                                            | 36,033                             | 20.0 (19.7, 20.3)      | 130                                | 10.1 (7.6, 13.4)       | 1,075                                 | 6.4 (5.7, 7.1)         | 95                                | 4.7 (3.4, 6.5)         | 37,333                           | 18.9 (18.6, 19.2)      |
| Other                                                               | 28,309                             | 9.5 (9.3, 9.7)         | 152                                | 5.8 (4.4, 7.7)         | 2,925                                 | 6.7 (6.2, 7.3)         | 217                               | 5.5 (4.2, 7.2)         | 31,603                           | 9.3 (9.1, 9.4)         |
| Maternal education                                                  |                                    |                        |                                    |                        |                                       |                        |                                   |                        |                                  |                        |
| Some high school education or less                                  | 19,549                             | 10.9 (10.7, 11.2)      | 142                                | 15.1 (11.6, 19.4)      | 3,595                                 | 23.8 (22.6, 25.0)      | 337                               | 23.7 (20.1, 27.7)      | 23,623                           | 11.9 (11.7, 12.2)      |
| High school graduate                                                | 39,477                             | 23.5 (23.2, 23.8)      | 372                                | 37.4 (32.7, 42.3)      | 6,023                                 | 41.8 (40.4, 43.1)      | 562                               | 41.5 (37.3, 45.8)      | 46,434                           | 24.9 (24.6, 25.3)      |
| Some college education                                              | 48,968                             | 26.5 (26.2, 26.8)      | 356                                | 36.5 (31.8, 41.4)      | 4,379                                 | 30.2 (29.0, 31.5)      | 432                               | 30.5 (26.8, 34.6)      | 54,135                           | 26.8 (26.5, 27.1)      |
| College graduate or more                                            | 64,052                             | 39.1 (38.7, 39.4)      | 99                                 | 11.1 (8.2, 14.7)       | 599                                   | 4.2 (3.7, 4.8)         | 62                                | 4.3 (2.9, 6.2)         | 64,812                           | 36.3 (36.0, 36.7)      |
| Marital status                                                      |                                    |                        |                                    |                        |                                       |                        |                                   |                        |                                  |                        |
| Married                                                             | 107,641                            | 64.2 (63.9, 64.5)      | 344                                | 38.1 (33.3, 43.1)      | 3,885                                 | 28.1 (26.9, 29.3)      | 381                               | 26.2 (22.6, 30.0)      | 112,251                          | 61.4 (61.0, 61.7)      |
| Other                                                               | 65,842                             | 35.8 (35.5, 36.1)      | 628                                | 61.9 (56.9, 66.7)      | 10,823                                | 71.9 (70.7, 73.1)      | 1,016                             | 73.8 (70.0, 77.4)      | 78,309                           | 38.6 (38.3, 39.0)      |
| Household income (\$)                                               |                                    |                        |                                    |                        |                                       |                        |                                   |                        |                                  |                        |
| ≤20,000                                                             | 42,281                             | 24.2 (23.8, 24.5)      | 397                                | 41.2 (36.1, 46.4)      | 8,369                                 | 58.3 (56.9, 59.7)      | 836                               | 63.4 (59.1, 67.5)      | 51,883                           | 26.8 (26.5, 27.2)      |
| 20,001–40,000                                                       | 33,924                             | 20.5 (20.2, 20.8)      | 251                                | 24.0 (20.0, 28.5)      | 3,190                                 | 25.0 (23.8, 26.3)      | 312                               | 21.7 (18.4, 25.4)      | 37,677                           | 20.8 (20.5, 21.2)      |
| 40,001–85,000                                                       | 39,210                             | 25.0 (24.6, 25.3)      | 176                                | 24.1 (19.6, 29.1)      | 1,611                                 | 13.2 (12.2, 14.1)      | 144                               | 11.2 (8.8, 14.2)       | 41,141                           | 24.1 (23.8, 24.4)      |
| ≥85,001                                                             | 43,231                             | 30.3 (30.0, 30.7)      | 79                                 | 10.8 (8.1, 14.3)       | 408                                   | 3.6 (3.1, 4.1)         | 36                                | 3.7 (2.3, 5.8)         | 43,754                           | 28.2 (27.9, 28.6)      |
| Maternal WIC program participation                                  |                                    |                        |                                    |                        |                                       |                        |                                   |                        |                                  |                        |
| No                                                                  | 62,128                             | 66.6 (66.3, 67.0)      | 469                                | 51.0 (45.9, 56.0)      | 8,849                                 | 39.8 (38.5, 41.2)      | 832                               | 38.9 (34.7, 43.2)      | 72,278                           | 64.6 (64.2, 64.9)      |
| Yes                                                                 | 109,079                            | 33.4 (33.0, 33.7)      | 492                                | 49.0 (44.0, 54.1)      | 5,668                                 | 60.2 (58.8, 61.5)      | 548                               | 61.1 (56.8, 65.3)      | 115,787                          | 35.4 (35.1, 35.8)      |
| Pregnancy intention                                                 |                                    |                        |                                    |                        |                                       |                        |                                   |                        |                                  |                        |
| Intended                                                            | 102,184                            | 60.1 (59.8, 60.5)      | 399                                | 40.7 (35.9, 45.7)      | 5,077                                 | 34.7 (33.4, 36.0)      | 468                               | 33.6 (29.7, 37.8)      | 108,128                          | 58.1 (57.8, 58.5)      |
| Unintended                                                          | 42,374                             | 24.2 (23.9, 24.6)      | 337                                | 34.1 (29.6, 39.0)      | 4,986                                 | 34.9 (33.6, 36.2)      | 498                               | 36.6 (32.6, 40.9)      | 48,195                           | 25.1 (24.8, 25.4)      |
| Unsure                                                              | 29,016                             | 15.6 (15.4, 15.9)      | 241                                | 25.2 (20.9, 30.0)      | 4,689                                 | 30.4 (29.2, 31.7)      | 438                               | 29.8 (26.0, 33.8)      | 34,384                           | 16.8 (16.5, 17.0)      |
| Kotelchuck index                                                    |                                    |                        |                                    |                        |                                       |                        |                                   |                        |                                  |                        |
| Inadequate                                                          | 20,042                             | 11.9 (11.7, 12.2)      | 138                                | 11.2 (8.7, 14.2)       | 3,360                                 | 21.5 (20.4, 22.7)      | 351                               | 24.3 (20.6, 28.4)      | 23,891                           | 12.6 (12.4, 12.9)      |
| Intermediate                                                        | 17,467                             | 10.8 (10.5, 11.0)      | 103                                | 12.0 (8.7, 16.4)       | 1,706                                 | 11.0 (10.2, 11.9)      | 170                               | 12.1 (9.6, 15.3)       | 19,446                           | 10.8 (10.6, 11.0)      |
| Adequate                                                            | 74,101                             | 46.1 (45.7, 46.4)      | 370                                | 41.1 (36.2, 46.2)      | 4,758                                 | 37.4 (36.0, 38.7)      | 425                               | 36.1 (32.0, 40.3)      | 79,654                           | 45.4 (45.0, 45.7)      |
| Adequate plus                                                       | 56,972                             | 31.2 (30.9, 31.6)      | 332                                | 35.7 (31.0, 40.7)      | 4,499                                 | 30.1 (28.8, 31.3)      | 424                               | 27.5 (23.9, 31.3)      | 62,227                           | 31.2 (30.8, 31.5)      |
| Prenatal care started in the 1 <sup>st</sup> trimester of pregnancy |                                    |                        |                                    |                        |                                       |                        |                                   |                        |                                  |                        |
| No                                                                  | 148,376                            | 11.5 (11.3, 11.8)      | 790                                | 14.4 (11.4, 18.1)      | 10,916                                | 19.6 (18.6, 20.7)      | 1,001                             | 23.0 (19.6, 26.9)      | 161,083                          | 12.1 (11.9, 12.4)      |
| Yes                                                                 | 20,165                             | 87.7 (87.5, 88.0)      | 148                                | 84.1 (80.2, 87.3)      | 3,130                                 | 78.5 (77.4, 79.6)      | 332                               | 75.0 (71.0, 78.6)      | 23,775                           | 87.0 (86.8, 87.3)      |
| No prenatal care                                                    | 1,331                              | 0.7 (0.7, 0.8)         | 15                                 | 1.5 (0.6, 3.3)         | 341                                   | 1.9 (1.5, 2.2)         | 33                                | 1.9 (1.0, 3.8)         | 1,720                            | 0.8 (0.8, 0.9)         |
| Parity                                                              |                                    |                        |                                    |                        |                                       |                        |                                   |                        |                                  |                        |
| Primiparous                                                         | 70,428                             | 40.0 (39.6, 40.3)      | 424                                | 44.6 (39.7, 49.7)      | 4,019                                 | 27.1 (25.9, 28.3)      | 464                               | 36.0 (31.9, 40.4)      | 75,335                           | 39.1 (38.7, 39.4)      |
| 2                                                                   | 54,731                             | 33.2 (32.8, 33.5)      | 289                                | 30.1 (25.8, 34.8)      | 4,144                                 | 31.0 (29.7, 32.3)      | 389                               | 26.7 (23.2, 30.4)      | 59,553                           | 33.0 (32.6, 33.3)      |
| ≥3                                                                  | 48,073                             | 26.9 (26.5, 27.2)      | 260                                | 25.3 (21.2, 29.8)      | 6,557                                 | 41.9 (40.6, 43.3)      | 546                               | 37.3 (33.3, 41.5)      | 55,436                           | 27.9 (27.6, 28.3)      |
| History of preterm birth                                            |                                    |                        |                                    |                        |                                       |                        |                                   |                        |                                  |                        |

(Continued)



Table 1. (Continued)

| Characteristics                           | Non-use (N = 173,574) <sup>a</sup> |                        | EC only use (N = 977) <sup>a</sup> |                        | CC only use (N = 14,752) <sup>a</sup> |                        | Dual use (N = 1,404) <sup>a</sup> |                        | Total (N = 190,707) <sup>a</sup> |                        |
|-------------------------------------------|------------------------------------|------------------------|------------------------------------|------------------------|---------------------------------------|------------------------|-----------------------------------|------------------------|----------------------------------|------------------------|
|                                           | No. <sup>a</sup>                   | % (95%CI) <sup>b</sup> | No. <sup>a</sup>                   | % (95%CI) <sup>b</sup> | No. <sup>a</sup>                      | % (95%CI) <sup>b</sup> | No. <sup>a</sup>                  | % (95%CI) <sup>b</sup> | No. <sup>a</sup>                 | % (95%CI) <sup>b</sup> |
| No                                        | 7,555                              | 96.7 (96.6, 96.9)      | 58                                 | 95.5 (93.3, 96.9)      | 1,316                                 | 93.3 (92.6, 93.9)      | 104                               | 95.5 (93.8, 96.7)      | 9,033                            | 96.5 (96.4, 96.6)      |
| Yes                                       | 165,666                            | 3.3 (3.1, 3.4)         | 918                                | 4.5 (3.1, 6.7)         | 13,393                                | 6.7 (6.1, 7.4)         | 1,297                             | 4.5 (3.3, 6.2)         | 181,274                          | 3.5 (3.4, 3.6)         |
| Pre-pregnancy BMI                         |                                    |                        |                                    |                        |                                       |                        |                                   |                        |                                  |                        |
| Underweight (<18.5 kg/m <sup>2</sup> )    | 5,136                              | 2.9 (2.8, 3.1)         | 59                                 | 4.9 (3.3, 7.2)         | 740                                   | 4.8 (4.3, 5.4)         | 89                                | 6.6 (4.7, 9.3)         | 6,024                            | 3.1 (3.0, 3.2)         |
| Normal (18.5–24.9 kg/m <sup>2</sup> )     | 71,108                             | 43.1 (42.8, 43.5)      | 377                                | 38.7 (33.8, 43.8)      | 5,299                                 | 36.6 (35.3, 37.9)      | 578                               | 41.6 (37.3, 45.9)      | 77,362                           | 42.7 (42.3, 43.0)      |
| Overweight (25.0–29.9 kg/m <sup>2</sup> ) | 44,822                             | 26.5 (26.2, 26.8)      | 237                                | 26.9 (22.7, 31.6)      | 3,447                                 | 24.7 (23.5, 25.9)      | 318                               | 26.5 (22.8, 30.7)      | 48,824                           | 26.4 (26.1, 26.7)      |
| Obese (30.0+ kg/m <sup>2</sup> )          | 48,767                             | 27.4 (27.1, 27.8)      | 282                                | 29.5 (25.1, 34.3)      | 4,808                                 | 33.9 (32.6, 35.3)      | 372                               | 25.3 (21.8, 29.1)      | 54,229                           | 27.8 (27.5, 28.2)      |
| Pre-pregnancy multivitamin use per week   |                                    |                        |                                    |                        |                                       |                        |                                   |                        |                                  |                        |
| Never                                     | 86,502                             | 49.4 (49.0, 49.8)      | 661                                | 72.0 (67.4, 76.1)      | 10,823                                | 74.2 (73.0, 75.4)      | 1,028                             | 75.3 (71.6, 78.8)      | 99,014                           | 51.4 (51.0, 51.7)      |
| 1–3 times                                 | 12,884                             | 7.3 (7.1, 7.5)         | 81                                 | 7.0 (5.0, 9.6)         | 883                                   | 5.6 (5.0, 6.2)         | 93                                | 6.5 (4.7, 8.9)         | 13,941                           | 7.2 (7.0, 7.4)         |
| 4–6 times                                 | 10,921                             | 6.3 (6.1, 6.5)         | 32                                 | 2.3 (1.4, 3.7)         | 442                                   | 3.0 (2.5, 3.5)         | 54                                | 2.8 (1.8, 4.4)         | 11,449                           | 6.0 (5.9, 6.2)         |
| Everyday                                  | 62,338                             | 37.0 (36.6, 37.4)      | 196                                | 18.8 (15.2, 23.0)      | 2,548                                 | 17.3 (16.3, 18.3)      | 226                               | 15.3 (12.6, 18.6)      | 65,308                           | 35.4 (35.1, 35.8)      |
| Pre-pregnancy alcoholic drinks per week   |                                    |                        |                                    |                        |                                       |                        |                                   |                        |                                  |                        |
| No                                        | 78,460                             | 43.1 (42.8, 43.5)      | 374                                | 40.9 (36.0, 46.0)      | 6,415                                 | 41.8 (40.5, 43.2)      | 537                               | 39.4 (35.3, 43.7)      | 85,786                           | 43.0 (42.6, 43.3)      |
| < 1 drink                                 | 45,245                             | 27.4 (27.1, 27.7)      | 235                                | 23.4 (19.4, 28.0)      | 3,640                                 | 26.5 (25.3, 27.8)      | 406                               | 31.2 (27.4, 35.4)      | 49,526                           | 27.3 (27.0, 27.7)      |
| 1 to 7 drinks                             | 44,479                             | 27.0 (26.7, 27.4)      | 283                                | 29.3 (25.0, 34.0)      | 3,762                                 | 25.9 (24.7, 27.2)      | 341                               | 23.6 (20.0, 27.5)      | 48,865                           | 26.9 (26.6, 27.3)      |
| > = 8 drinks                              | 4,181                              | 2.5 (2.4, 2.6)         | 76                                 | 6.3 (4.5, 8.8)         | 800                                   | 5.7 (5.1, 6.4)         | 105                               | 5.8 (4.3, 7.8)         | 5,162                            | 2.7 (2.6, 2.8)         |
| Delivery method                           |                                    |                        |                                    |                        |                                       |                        |                                   |                        |                                  |                        |
| Vaginal                                   | 113,065                            | 66.8 (66.5, 67.2)      | 634                                | 67.8 (63.0, 72.2)      | 9,325                                 | 64.6 (63.2, 65.9)      | 896                               | 65.6 (61.3, 69.6)      | 123,920                          | 66.7 (66.3, 67.0)      |
| Assisted                                  | 5,450                              | 3.2 (3.1, 3.4)         | 29                                 | 2.8 (1.5, 5.2)         | 346                                   | 2.7 (2.3, 3.2)         | 33                                | 2.8 (1.6, 4.9)         | 5,858                            | 3.2 (3.1, 3.3)         |
| C-section                                 | 54,923                             | 29.9 (29.6, 30.3)      | 313                                | 29.4 (25.1, 34.1)      | 5,067                                 | 32.8 (31.5, 34.1)      | 474                               | 31.6 (27.7, 35.8)      | 60,777                           | 30.1 (29.8, 30.5)      |
| Year of delivery                          |                                    |                        |                                    |                        |                                       |                        |                                   |                        |                                  |                        |
| 2016                                      | 29,770                             | 19.0 (18.9, 19.1)      | 135                                | 13.7 (10.6, 17.5)      | 2,691                                 | 19.7 (18.7, 20.9)      | 270                               | 18.5 (15.3, 22.1)      | 32,866                           | 19.0 (18.9, 19.1)      |
| 2017                                      | 32,187                             | 18.2 (18.1, 18.3)      | 142                                | 14.8 (11.7, 18.4)      | 3,036                                 | 20.5 (19.5, 21.5)      | 250                               | 18.5 (15.5, 22.0)      | 35,615                           | 18.3 (18.3, 18.4)      |
| 2018                                      | 37,625                             | 20.7 (20.5, 20.8)      | 192                                | 18.8 (15.3, 22.8)      | 3,309                                 | 22.3 (21.2, 23.4)      | 306                               | 22.2 (18.9, 25.9)      | 41,432                           | 20.8 (20.7, 20.8)      |
| 2019                                      | 38,506                             | 22.1 (21.9, 22.2)      | 233                                | 23.5 (19.3, 28.2)      | 3,022                                 | 20.2 (19.2, 21.4)      | 305                               | 21.0 (17.6, 24.7)      | 42,066                           | 21.9 (21.8, 22.0)      |
| 2020                                      | 35,486                             | 20.1 (20.0, 20.2)      | 275                                | 29.3 (25.0, 34.1)      | 2,694                                 | 17.2 (16.3, 18.3)      | 273                               | 19.9 (16.7, 23.5)      | 38,728                           | 20.0 (19.9, 20.0)      |

<sup>a</sup>Weighted sample size.<sup>b</sup>Weighted prevalence and corresponding confidence interval (expressed as a percentage).<https://doi.org/10.1371/journal.pone.0287348.t001>

prenatal care, initiate prenatal care in the first trimester of pregnancy, and take multivitamins prior to pregnancy. They were more likely to receive federal food and nutritional assistance. Among women who reported use of tobacco products, EC only users were more likely to be younger, more educated, be married, have a higher total family income, have no previous live births, have at least “adequate” prenatal care and initiate care during the first trimester compared to CC only users; dual users were predominantly non-Hispanic White, had a lower total family income, had no previous live births, and had a lower pre-pregnancy BMI compared with CC only users (Table 1).

The weighted frequency of preterm birth <37 weeks was 8.0% (95%CI: 7.8%, 8.2%), low birth weight <2,500 grams 6.5% (95%CI: 6.4%, 6.6%), and SGA 9.7% (95%CI: 9.4%, 9.9%) (Table 2). Compared with non-use, EC only use was associated with a significantly increased risk of preterm birth (adjusted risk ratio [aRR]: 1.29, 95%CI: 1.00, 1.65) and low birth weight (aRR: 1.38, 95%CI: 1.09, 1.75) in both the univariate and adjusted analyses, but not SGA (aRR:

**Table 2. Prevalence of preterm birth, low birth weight and SGA of women who gave live singleton births in 2016–2020 and participated in the PRAMS survey.**

| Outcomes                     | Non-use (N = 173,574) <sup>a</sup> |                        | EC only use (N = 977) <sup>a</sup> |                        | CC only use (N = 14,752) <sup>a</sup> |                        | Dual use (N = 1,404) <sup>a</sup> |                        | Total (N = 190,707) <sup>a</sup> |                        |
|------------------------------|------------------------------------|------------------------|------------------------------------|------------------------|---------------------------------------|------------------------|-----------------------------------|------------------------|----------------------------------|------------------------|
|                              | No. <sup>a</sup>                   | % (95%CI) <sup>b</sup> | No. <sup>a</sup>                   | % (95%CI) <sup>b</sup> | No. <sup>a</sup>                      | % (95%CI) <sup>b</sup> | No. <sup>a</sup>                  | % (95%CI) <sup>b</sup> | No. <sup>a</sup>                 | % (95%CI) <sup>b</sup> |
| Gestational age (weeks)      |                                    |                        |                                    |                        |                                       |                        |                                   |                        |                                  |                        |
| Preterm birth                | 26,461                             | 7.8 (7.6, 8.0)         | 206                                | 10.4 (8.2, 13.1)       | 3,208                                 | 11.9 (11.2, 12.7)      | 324                               | 10.0 (8.2, 12.3)       | 30,199                           | 8.1 (7.9, 8.3)         |
| <28                          | 2,306                              | 0.5 (0.4, 0.5)         | 26                                 | 1.0 (0.5, 1.9)         | 253                                   | 0.7 (0.6, 0.9)         | 26                                | 0.5 (0.2, 1.2)         | 2,611                            | 0.5 (0.5, 0.5)         |
| 28–33                        | 7,280                              | 1.5 (1.5, 1.6)         | 54                                 | 2.1 (1.4, 3.2)         | 803                                   | 2.1 (1.8, 2.3)         | 102                               | 2.9 (2.0, 4.1)         | 8,239                            | 1.6 (1.5, 1.6)         |
| 34–36                        | 16,875                             | 5.8 (5.6, 5.9)         | 126                                | 7.3 (5.4, 9.8)         | 2,152                                 | 9.1 (8.4, 9.9)         | 196                               | 6.7 (5.1, 8.6)         | 19,349                           | 6.0 (5.9, 6.2)         |
| Term birth                   | 146,942                            | 92.2 (92.0, 92.4)      | 770                                | 89.6 (86.9, 91.8)      | 11,502                                | 88.1 (87.3, 88.8)      | 1,077                             | 90.0 (87.7, 91.8)      | 160,291                          | 91.9 (91.7, 92.1)      |
| Birth weight (grams)         |                                    |                        |                                    |                        |                                       |                        |                                   |                        |                                  |                        |
| Low birth weight (<2,500)    | 30,482                             | 6.1 (5.9, 6.2)         | 236                                | 8.7 (7.0, 10.7)        | 4,532                                 | 12.2 (11.6, 12.8)      | 477                               | 12.5 (10.4, 14.9)      | 35,727                           | 6.5 (6.4, 6.6)         |
| <1,000                       | 2,326                              | 0.5 (0.5, 0.5)         | 29                                 | 1.2 (0.7, 2.2)         | 266                                   | 0.7 (0.6, 0.9)         | 31                                | 0.8 (0.4, 1.8)         | 2,652                            | 0.5 (0.5, 0.5)         |
| 1,000-<1,500                 | 2,833                              | 0.6 (0.5, 0.6)         | 16                                 | 0.4 (0.2, 0.9)         | 306                                   | 0.8 (0.6, 1.0)         | 32                                | 1.1 (0.5, 2.1)         | 3,187                            | 0.6 (0.6, 0.6)         |
| 1,500-<2,500                 | 25,323                             | 5.0 (4.9, 5.1)         | 191                                | 7.0 (5.6, 8.8)         | 3,960                                 | 10.7 (10.1, 11.3)      | 414                               | 10.6 (8.8, 12.8)       | 29,888                           | 5.4 (5.3, 5.5)         |
| Normal birth weight (≥2,500) | 142,899                            | 93.9 (93.8, 94.1)      | 741                                | 91.3 (89.3, 93.0)      | 10,206                                | 87.8 (87.2, 88.4)      | 924                               | 87.5 (85.1, 89.6)      | 154,770                          | 93.5 (93.4, 93.6)      |
| SGA                          |                                    |                        |                                    |                        |                                       |                        |                                   |                        |                                  |                        |
| Yes                          | 22,751                             | 8.9 (8.7, 9.1)         | 163                                | 11.4 (8.7, 14.9)       | 3,689                                 | 19.0 (18.0, 20.0)      | 368                               | 22.4 (19.0, 26.3)      | 26,971                           | 9.7 (9.5, 9.9)         |
| No                           | 150,410                            | 91.1 (90.9, 91.3)      | 812                                | 88.6 (85.1, 91.3)      | 10,995                                | 81.0 (80.0, 82.0)      | 1,031                             | 77.6 (73.7, 81.0)      | 163,248                          | 90.3 (90.1, 90.5)      |

<sup>a</sup>Unweighted sample size.<sup>b</sup>Weighted prevalence and corresponding confidence interval (expressed as a percentage).<https://doi.org/10.1371/journal.pone.0287348.t002>

1.04, 95%CI: 0.76, 1.44). Dual use, when compared with non-use, was associated with an increased risk of preterm birth (aRR: 1.19, 95%CI: 0.97, 1.48), low birth weight (aRR: 2.01, 95% CI: 1.63, 2.48), and SGA (aRR: 2.27, 95%CI: 1.90, 2.72), though the risk of preterm birth did not reach the statistical significance after adjusting for the covariates. CC only use was associated with the risk of preterm birth (aRR: 1.29, 95%CI: 1.18, 1.40), low birth weight (aRR: 1.78, 95% CI: 1.66, 1.91), and SGA (aRR: 2.02, 95%CI: 1.88, 2.17) in both unadjusted and adjusted analyses (Fig 2). Of the 8.0% women who had preterm birth infants, 6.2% (95%CI: 5.8%, 6.7%), 20.1% (95%CI: 19.3%, 20.9%) and 73.7% (95%CI: 72.8%, 74.6%) delivered <28 weeks, 28–33 weeks and 34–36 weeks, respectively. Similarly, among women who had low birth weight infants, 8.1% (95%CI: 7.6%, 8.7%), 9.4% (95%CI: 8.8%, 10.0%), and 82.5% (95%CI: 81.7%, 83.3%) had extreme low birth weight <1,000 grams, very low birth weight 1,000-<1,500 grams, and low birth weight 1,500-<2,500 grams, respectively (Table 2). Ordered logistic regression with categorical gestational age and birth weight showed consistent results (S1 Fig).

In the analysis exploring the association between tobacco products and low birth weight additionally adjusting for gestational age, the risk of low birth weight when comparing with non-use was decreased in all three tobacco product use groups (S2 Fig). While the risk remained statistically significant for CC only use (aRR: 1.54, 95%CI: 1.45, 1.64) and dual use (aRR: 1.71, 95%CI: 1.42, 2.06), the risk of low birth weight became non-significant for the EC only use group (aRR: 1.10, 95%CI: 0.90, 1.35). This non-statistically significant relationship between EC only use and low birth weight persisted in the subgroup of women who had had term birth infants (aRR: 1.21, 95%CI: 0.78, 1.86) (Fig 3). In contrast, dual use remained a significant risk factor for low birth weight (Fig 3).

To determine whether quitting EC use during pregnancy reduces the risk of adverse birth outcomes, we conducted the second analysis of 7,877 (weighted N = 422,533) women who self-reported EC use prior to pregnancy, with and without CC use (study population two). Among them, 75.3% (95%CI: 73.7%, 76.8%) quit EC use during pregnancy, and 24.7% (95%



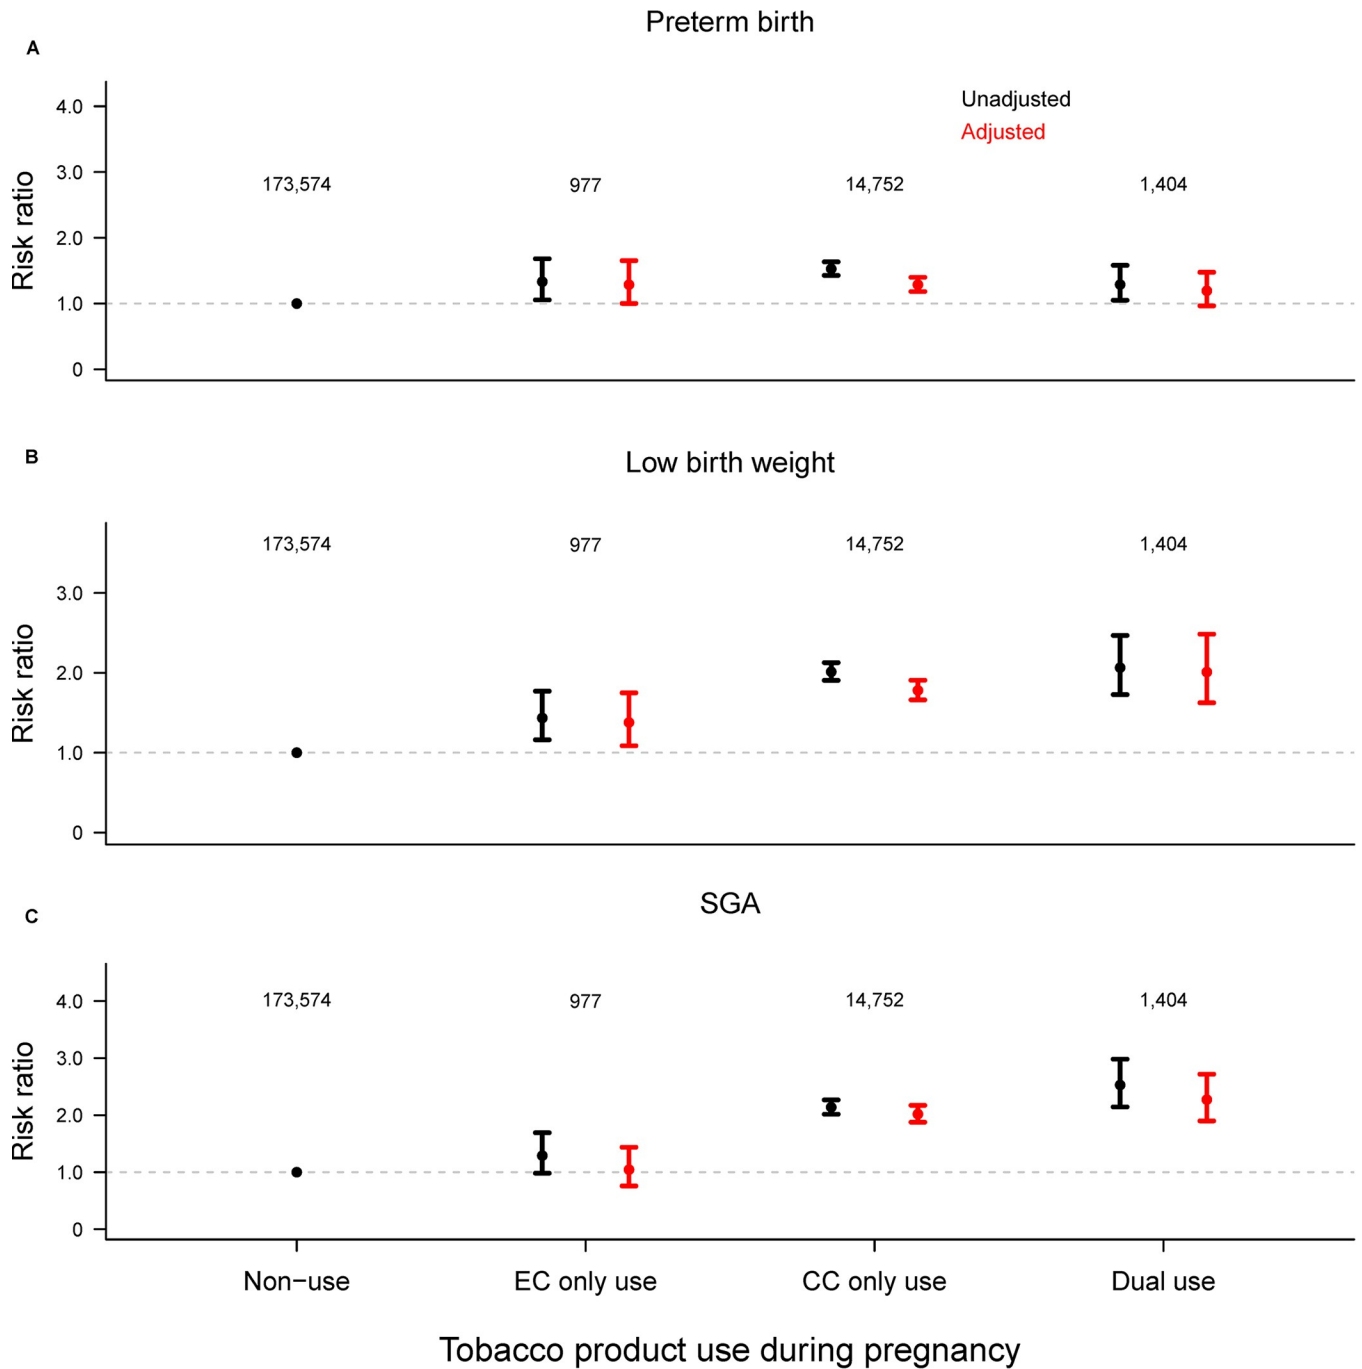

**Fig 2.** Risk of (A) preterm birth, (B) low birth weight, and (C) SGA comparing women of EC only use, CC only use, and dual use during pregnancy to women who were non-users. Numbers presented are unweighted sample sizes in each group. The multivariable modified Poisson regression (red) was adjusted for maternal age at delivery, maternal race/ethnicity, maternal education, marital status, household income, prenatal federal nutritional assistance, pregnancy intention, the Kotelchuck index, initiation of prenatal care in the first trimester, pre-pregnancy multivitamin use, pre-pregnancy alcoholic drinking frequency, parity, history of preterm birth, maternal pre-pregnancy BMI, maternal residency, and year of delivery.

<https://doi.org/10.1371/journal.pone.0287348.g002>

CI: 23.2%, 26.3%) continued EC use (Fig 1). Forty-three percent of women who used ECs prior to pregnancy were adolescents and/or young adults <25 years age group, and 76.7% were non-Hispanic White. Compared with women who continue using ECs during

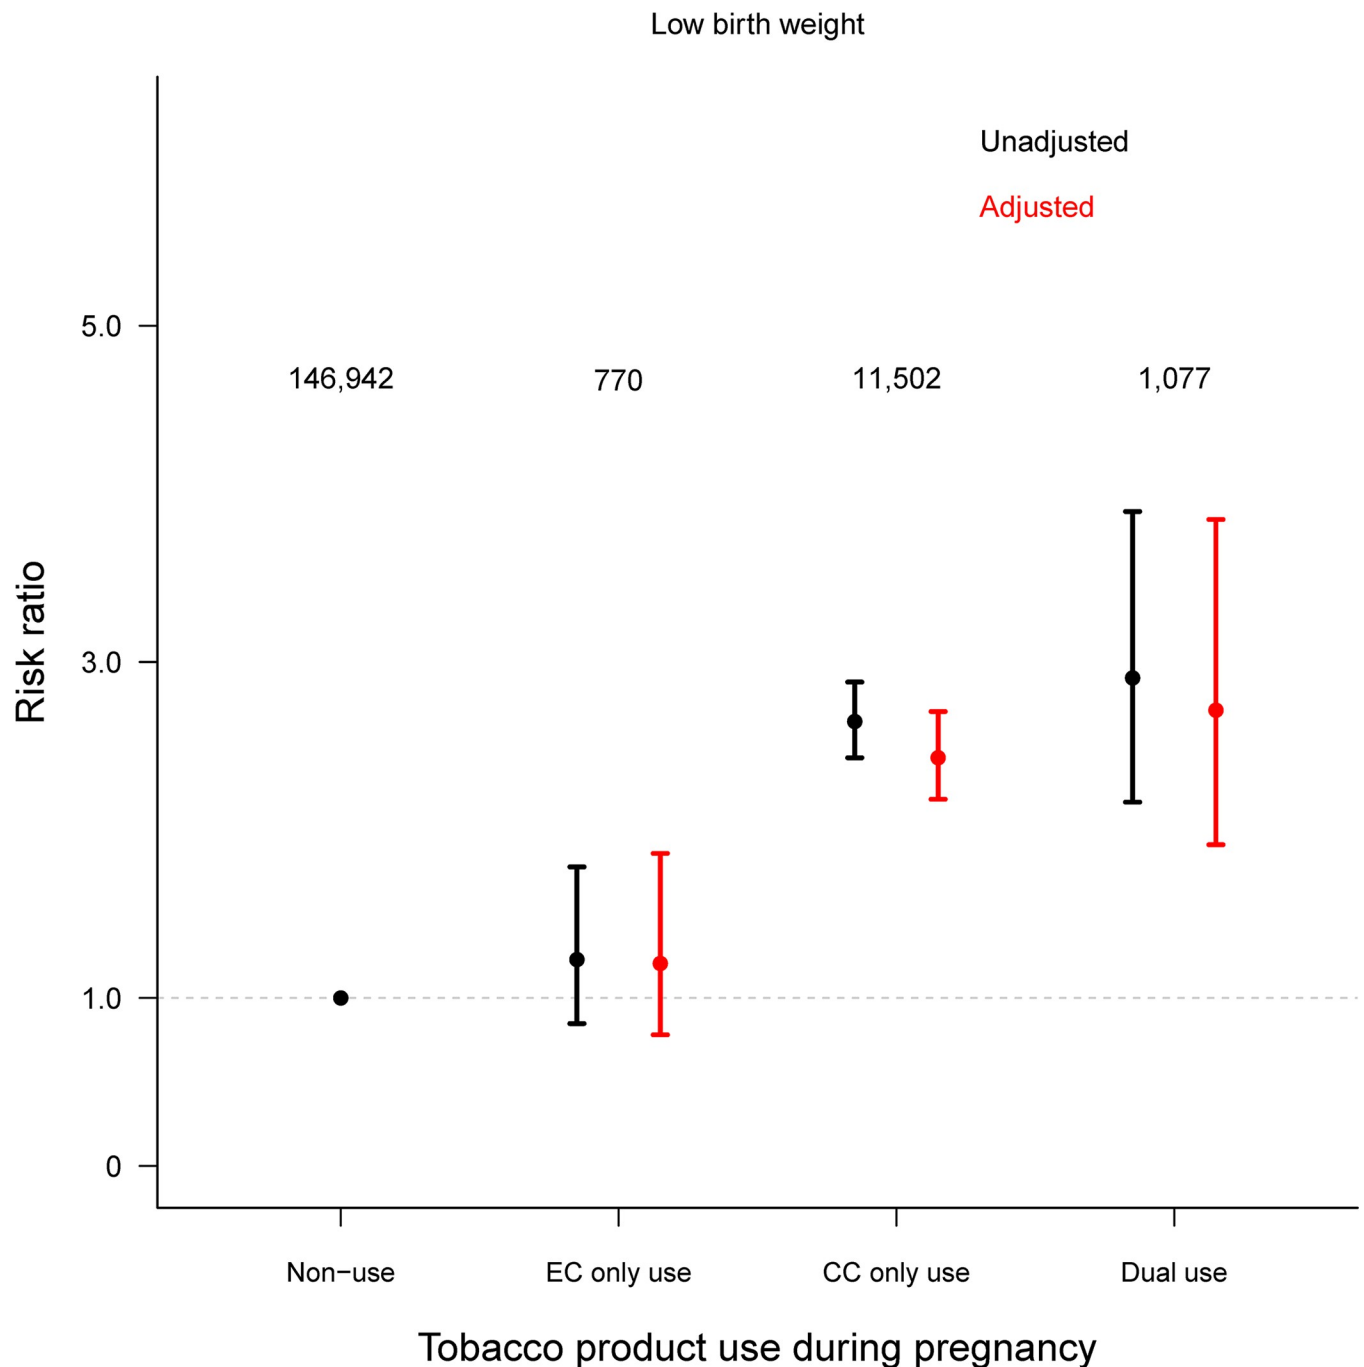

**Fig 3. Risk of low birth weight comparing women of EC only use, CC only use, and dual use during pregnancy to women who were non-users in a subset of women who had had term birth babies ( $\geq 37$  weeks).** Numbers presented are unweighted sample sizes in each group. The multivariable modified Poisson regression (red) was adjusted for maternal age at delivery, maternal race/ethnicity, maternal education, marital status, household income, prenatal federal nutritional assistance, pregnancy intention, the Kotelchuck index, initiation of prenatal care in the first trimester, pre-pregnancy multivitamin use, pre-pregnancy alcoholic drinking frequency, parity, history of preterm birth, maternal pre-pregnancy BMI, delivery method, maternal residency, and year of delivery.

<https://doi.org/10.1371/journal.pone.0287348.g003>

pregnancy, women who quit use were more likely to be race/ethnicities other than non-Hispanic White, have higher education, be married, have a higher household income, and be less likely to enroll in the federal food and nutritional assistance program (Table 3). Women who

**Table 3. Demographic, behavioral and health related characteristics of women EC users who gave live singleton births in 2016–2020 and participated in the PRAMS survey.**

| Characteristics                                                           | Continued use (n = 2,002 <sup>a</sup> ) |                        | Quit use (n = 5,875 <sup>a</sup> ) |                   | Overall |                   |
|---------------------------------------------------------------------------|-----------------------------------------|------------------------|------------------------------------|-------------------|---------|-------------------|
|                                                                           | N <sup>a</sup>                          | % (95%CI) <sup>b</sup> | N                                  | % (95%CI)         | N       | % (95%CI)         |
| <b>Maternal age</b>                                                       |                                         |                        |                                    |                   |         |                   |
| ≤ 24                                                                      | 741                                     | 38.4 (34.9, 42.0)      | 2,661                              | 44.6 (42.6, 46.7) | 3,402   | 43.1 (41.3, 44.8) |
| 25–29                                                                     | 599                                     | 28.6 (25.5, 31.9)      | 1,614                              | 27.6 (25.8, 29.4) | 2,213   | 27.8 (26.3, 29.4) |
| 30–34                                                                     | 435                                     | 22.9 (20.1, 26.1)      | 1,057                              | 18.0 (16.6, 19.6) | 1,492   | 19.2 (17.9, 20.7) |
| ≥35                                                                       | 226                                     | 10.0 (8.2, 12.3)       | 542                                | 9.8 (8.6, 11.0)   | 768     | 9.8 (8.8, 10.9)   |
| <b>Maternal race/ethnicity</b>                                            |                                         |                        |                                    |                   |         |                   |
| Non Hispanic White                                                        | 1,295                                   | 81.9 (79.4, 84.2)      | 3,449                              | 74.9 (73.3, 76.6) | 4,744   | 76.7 (75.3, 78.0) |
| Non Hispanic Black                                                        | 178                                     | 4.9 (3.7, 6.4)         | 594                                | 7.2 (6.3, 8.3)    | 772     | 6.7 (5.8, 7.5)    |
| Hispanic                                                                  | 203                                     | 7.6 (6.1, 9.5)         | 802                                | 10.7 (9.6, 12.0)  | 1,005   | 9.9 (9.0, 11.0)   |
| Other                                                                     | 317                                     | 5.6 (4.5, 6.9)         | 991                                | 7.1 (6.3, 8.0)    | 1,308   | 6.7 (6.0, 7.5)    |
| <b>Maternal education</b>                                                 |                                         |                        |                                    |                   |         |                   |
| Some high school or less                                                  | 421                                     | 20.7 (17.9, 24.0)      | 825                                | 13.4 (12.0, 14.8) | 1,246   | 15.2 (13.9, 16.5) |
| High school graduate                                                      | 788                                     | 40.3 (36.8, 43.8)      | 2,087                              | 37.0 (35.1, 39.1) | 2,875   | 37.8 (36.1, 39.6) |
| Some college                                                              | 642                                     | 31.7 (28.5, 35.1)      | 2,161                              | 35.2 (33.3, 37.1) | 2,803   | 34.3 (32.7, 36.0) |
| College graduate or more                                                  | 133                                     | 7.3 (5.6, 9.4)         | 758                                | 14.4 (13.1, 15.9) | 891     | 12.7 (11.5, 13.9) |
| <b>Marital status</b>                                                     |                                         |                        |                                    |                   |         |                   |
| Married                                                                   | 615                                     | 32.2 (28.9, 35.6)      | 2,108                              | 37.5 (35.5, 39.5) | 2,723   | 36.2 (34.5, 37.9) |
| Other                                                                     | 1,376                                   | 67.8 (64.4, 71.1)      | 3,759                              | 62.5 (60.5, 64.5) | 5,135   | 63.8 (62.1, 65.5) |
| <b>Household income (\$)</b>                                              |                                         |                        |                                    |                   |         |                   |
| ≤ 20,000                                                                  | 1,031                                   | 53.9 (50.3, 57.6)      | 2,333                              | 40.2 (38.1, 42.2) | 3,364   | 43.6 (41.8, 45.4) |
| 20,001–40,000                                                             | 478                                     | 22.3 (19.6, 25.4)      | 1,472                              | 25.7 (23.9, 27.6) | 1,950   | 24.9 (23.4, 26.5) |
| 40,001–85,000                                                             | 263                                     | 16.9 (14.2, 20.0)      | 1,124                              | 22.2 (20.5, 24.0) | 1,387   | 20.9 (19.4, 22.4) |
| ≥85,001                                                                   | 101                                     | 6.8 (5.2, 8.8)         | 566                                | 12.0 (10.7, 13.4) | 667     | 10.7 (9.6, 11.8)  |
| <b>Maternal WIC use during pregnancy</b>                                  |                                         |                        |                                    |                   |         |                   |
| No                                                                        | 877                                     | 44.8 (41.2, 48.4)      | 3,009                              | 55.0 (53.0, 57.1) | 3,886   | 52.5 (50.7, 54.3) |
| Yes                                                                       | 1,090                                   | 55.2 (51.6, 58.8)      | 2,795                              | 45.0 (42.9, 47.0) | 3,885   | 47.5 (45.7, 49.3) |
| <b>Pregnancy intention</b>                                                |                                         |                        |                                    |                   |         |                   |
| Unintended                                                                | 697                                     | 36.4 (33.0, 39.9)      | 2,022                              | 33.2 (31.3, 35.2) | 2,719   | 34.0 (32.3, 35.7) |
| Intended                                                                  | 743                                     | 37.3 (33.9, 40.8)      | 2,423                              | 44.1 (42.1, 46.1) | 3,166   | 42.4 (40.7, 44.2) |
| Unsure                                                                    | 562                                     | 26.4 (23.3, 29.7)      | 1,430                              | 22.7 (21.0, 24.4) | 1,992   | 23.6 (22.1, 25.1) |
| <b>Kotelcholck index</b>                                                  |                                         |                        |                                    |                   |         |                   |
| Inadequate                                                                | 412                                     | 18.3 (15.7, 21.3)      | 857                                | 14.6 (13.2, 16.2) | 1,269   | 15.5 (14.2, 16.9) |
| Intermediate                                                              | 236                                     | 12.7 (10.3, 15.6)      | 609                                | 10.6 (9.4, 11.9)  | 845     | 11.1 (10.0, 12.3) |
| Adequate                                                                  | 668                                     | 38.7 (35.2, 42.2)      | 2,309                              | 42.8 (40.8, 44.9) | 2,977   | 41.8 (40.1, 43.6) |
| Adequate Plus                                                             | 626                                     | 30.3 (27.2, 33.7)      | 1,941                              | 31.9 (30.1, 33.8) | 2,567   | 31.5 (29.9, 33.2) |
| <b>Prenatal care started in the 1<sup>st</sup> trimester of pregnancy</b> |                                         |                        |                                    |                   |         |                   |
| No                                                                        | 393                                     | 18.4 (15.9, 21.4)      | 797                                | 13.4 (12.0, 15.0) | 1,190   | 14.7 (13.4, 16.0) |
| Yes                                                                       | 1,506                                   | 79.2 (76.2, 82.0)      | 4,950                              | 85.9 (84.3, 87.4) | 6,456   | 84.3 (82.9, 85.6) |
| No Prenatal Visit                                                         | 46                                      | 2.3 (1.3, 4.0)         | 40                                 | 0.7 (0.4, 1.1)    | 86      | 1.1 (0.7, 1.6)    |
| <b>Parity</b>                                                             |                                         |                        |                                    |                   |         |                   |
| Primiparous                                                               | 762                                     | 40.9 (37.4, 44.5)      | 3,216                              | 55.0 (52.9, 57.0) | 3,978   | 51.5 (49.7, 53.2) |
| 2                                                                         | 564                                     | 27.3 (24.3, 30.4)      | 1,437                              | 25.5 (23.8, 27.3) | 2,001   | 25.9 (24.4, 27.5) |
| ≥3                                                                        | 668                                     | 31.8 (28.6, 35.2)      | 1,208                              | 19.5 (18.0, 21.2) | 1,876   | 22.6 (21.2, 24.1) |
| <b>History of preterm birth</b>                                           |                                         |                        |                                    |                   |         |                   |
| No                                                                        | 1,859                                   | 95.4 (94.0, 96.5)      | 5,627                              | 97.3 (96.6, 97.8) | 7,486   | 96.8 (96.2, 97.3) |

(Continued)

Table 3. (Continued)

| Characteristics                           | Continued use (n = 2,002 <sup>a</sup> ) |                        | Quit use (n = 5,875 <sup>a</sup> ) |                   | Overall |                   |
|-------------------------------------------|-----------------------------------------|------------------------|------------------------------------|-------------------|---------|-------------------|
|                                           | N <sup>a</sup>                          | % (95%CI) <sup>b</sup> | N                                  | % (95%CI)         | N       | % (95%CI)         |
| Yes                                       | 140                                     | 4.6 (3.5, 6.0)         | 236                                | 2.7 (2.2, 3.4)    | 376     | 3.2 (2.7, 3.8)    |
| Pre-pregnancy BMI (kg/m <sup>2</sup> )    |                                         |                        |                                    |                   |         |                   |
| Underweight (<18.5 kg/m <sup>2</sup> )    | 124                                     | 6.0 (4.5, 7.9)         | 265                                | 3.9 (3.3, 4.8)    | 389     | 4.5 (3.8, 5.2)    |
| Normal (18.5–24.9 kg/m <sup>2</sup> )     | 791                                     | 39.0 (35.5, 42.6)      | 2,315                              | 41.1 (39.1, 43.1) | 3,106   | 40.6 (38.8, 42.3) |
| Overweight (25.0–29.9 kg/m <sup>2</sup> ) | 462                                     | 27.2 (24.1, 30.6)      | 1,443                              | 24.9 (23.1, 26.7) | 1,905   | 25.4 (23.9, 27.0) |
| Obese (30.0+ kg/m <sup>2</sup> )          | 564                                     | 27.8 (24.7, 31.2)      | 1,738                              | 30.1 (28.2, 32.0) | 2,302   | 29.5 (27.9, 31.2) |
| Pre-pregnancy multivitamin use per week   |                                         |                        |                                    |                   |         |                   |
| Never                                     | 1,392                                   | 72.6 (69.4, 75.6)      | 4,030                              | 69.6 (67.7, 71.4) | 5,422   | 70.3 (68.7, 71.9) |
| 1–3 times                                 | 157                                     | 6.7 (5.3, 8.5)         | 375                                | 5.8 (5.0, 6.8)    | 532     | 6.0 (5.3, 6.9)    |
| 4–6 times                                 | 71                                      | 2.3 (1.6, 3.3)         | 244                                | 4.1 (3.4, 4.9)    | 315     | 3.6 (3.1, 4.3)    |
| Everyday                                  | 373                                     | 18.4 (15.8, 21.3)      | 1,207                              | 20.6 (19.0, 22.2) | 1,580   | 20.0 (18.7, 21.5) |
| Delivery method                           |                                         |                        |                                    |                   |         |                   |
| Vaginal                                   | 1,295                                   | 67.2 (63.8, 70.5)      | 3,802                              | 66.1 (64.1, 68.0) | 5,097   | 66.4 (64.7, 68.0) |
| Assisted                                  | 49                                      | 2.2 (1.4, 3.4)         | 211                                | 3.8 (3.1, 4.7)    | 260     | 3.4 (2.8, 4.1)    |
| C-section                                 | 657                                     | 30.6 (27.4, 34.0)      | 1,860                              | 30.1 (28.3, 32.0) | 2,517   | 30.2 (28.6, 31.9) |
| Average daily CC use before pregnancy     |                                         |                        |                                    |                   |         |                   |
| No                                        | 515                                     | 27.9 (24.8, 31.3)      | 2,119                              | 37.2 (35.2, 39.2) | 2,634   | 34.9 (33.2, 36.6) |
| ≤ 10                                      | 815                                     | 38.3 (34.8, 41.8)      | 2,602                              | 43.2 (41.2, 45.2) | 3,417   | 42.0 (40.2, 43.7) |
| 11–20                                     | 447                                     | 23.7 (20.8, 26.9)      | 822                                | 15.0 (13.6, 16.5) | 1,269   | 17.1 (15.8, 18.5) |
| >20                                       | 199                                     | 10.1 (8.0, 12.5)       | 279                                | 4.7 (3.9, 5.6)    | 478     | 6.0 (5.2, 6.9)    |
| Average daily CC use during pregnancy     |                                         |                        |                                    |                   |         |                   |
| No                                        | 834                                     | 46.1 (42.5, 49.7)      | 4,526                              | 78.0 (76.2, 79.7) | 5,360   | 70.1 (68.5, 71.7) |
| ≤10                                       | 910                                     | 43.6 (40.1, 47.2)      | 1,148                              | 19.0 (17.5, 20.7) | 2,058   | 25.1 (23.6, 26.6) |
| 11–20                                     | 173                                     | 7.8 (6.1, 9.9)         | 140                                | 2.6 (2.0, 3.4)    | 313     | 3.9 (3.2, 4.6)    |
| >20                                       | 61                                      | 2.5 (1.7, 3.7)         | 30                                 | 0.4 (0.2, 0.7)    | 91      | 0.9 (0.7, 1.3)    |
| Year of delivery                          |                                         |                        |                                    |                   |         |                   |
| 2016                                      | 333                                     | 15.9 (13.4, 18.7)      | 963                                | 17.0 (15.5, 18.6) | 1,296   | 16.7 (15.4, 18.1) |
| 2017                                      | 320                                     | 16.9 (14.4, 19.6)      | 916                                | 16.2 (14.8, 17.7) | 1,236   | 16.4 (15.1, 17.7) |
| 2018                                      | 421                                     | 20.2 (17.6, 23.1)      | 1,115                              | 18.5 (17.0, 20.0) | 1,536   | 18.9 (17.6, 20.2) |
| 2019                                      | 458                                     | 22.5 (19.5, 25.7)      | 1,352                              | 22.8 (21.2, 24.6) | 1,810   | 22.7 (21.3, 24.3) |
| 2020                                      | 470                                     | 24.6 (21.7, 27.8)      | 1,529                              | 25.5 (23.8, 27.3) | 1,999   | 25.3 (23.8, 26.8) |

<sup>a</sup>Unweighted sample size.

<sup>b</sup>Weighted prevalence and corresponding confidence interval (expressed as a percentage).

<https://doi.org/10.1371/journal.pone.0287348.t003>

quit EC use were more likely to have an intended pregnancy, have at least “adequate” prenatal care, start prenatal care during the first trimester of pregnancy, use vitamins prior to becoming pregnant, be less likely to have live births prior to the current pregnancy and be less likely to have prior preterm birth (Table 3).

Quitting EC use was associated with women’s frequency of pre-pregnancy EC use as well as the amount of pre-pregnancy and during-pregnancy CC use (if they dual use CCs). Women with greater frequency of EC use were less likely to quit ECs (less than one day per week [79.1%] vs. 2–6 days per week [75.4%] vs. once per day [74.1%] vs. more than once per day [71.8%]). Among those who continued using ECs during pregnancy, the majority maintained their frequency of use (Table 4). Similarly, women who were never or light users of CCs before

**Table 4. Change in the frequency of EC use during pregnancy among women EC users who gave live singleton births in 2016–2020 and participated in the PRAMS survey.**

| Frequency of EC use during pregnancy | Frequency of EC use before pregnancy |                        |                   |                        |                |                        |                |                        | Total          |                        |
|--------------------------------------|--------------------------------------|------------------------|-------------------|------------------------|----------------|------------------------|----------------|------------------------|----------------|------------------------|
|                                      | <1 day per week                      |                        | 2–6 days per week |                        | Once per day   |                        | >1 per day     |                        |                |                        |
|                                      | N <sup>a</sup>                       | % (95%CI) <sup>b</sup> | N <sup>a</sup>    | % (95%CI) <sup>b</sup> | N <sup>a</sup> | % (95%CI) <sup>b</sup> | N <sup>a</sup> | % (95%CI) <sup>b</sup> | N <sup>a</sup> | % (95%CI) <sup>b</sup> |
| No use <sup>c</sup>                  | 2,415                                | 79.1 (76.6, 81.4)      | 774               | 75.4 (71.1, 79.3)      | 566            | 74.1 (68.9, 78.8)      | 2,120          | 71.8 (69.2, 74.3)      | 5,875          | 75.3 (73.7, 76.8)      |
| <1 day per week                      | 537                                  | 17.6 (15.5, 20.0)      | 88                | 6.7 (4.9, 9.1)         | 31             | 3.6 (2.0, 6.4)         | 91             | 2.8 (2.0, 4.0)         | 747            | 9.0 (8.0, 10.1)        |
| 2–6 days per week                    | 52                                   | 1.7 (1.2, 2.6)         | 142               | 13.5 (10.5, 17.2)      | 13             | 1.9 (0.9, 4.1)         | 73             | 1.7 (1.1, 2.5)         | 280            | 3.2 (2.7, 3.9)         |
| Once per day                         | 27                                   | 0.8 (0.4, 1.7)         | 29                | 2.2 (1.2, 4.1)         | 122            | 15.3 (11.7, 19.9)      | 111            | 3.6 (2.6, 4.9)         | 289            | 3.5 (2.9, 4.2)         |
| >1 per day                           | 22                                   | 0.8 (0.4, 1.6)         | 29                | 2.1 (1.1, 4.0)         | 32             | 5.0 (3.0, 8.1)         | 603            | 20.1 (17.9, 22.4)      | 686            | 9.0 (8.1, 10.1)        |

<sup>a</sup>Unweighted sample size.

<sup>b</sup>Weighted prevalence and corresponding confidence interval (expressed as a percentage).

<sup>c</sup>People who quit EC use during pregnancy

<https://doi.org/10.1371/journal.pone.0287348.t004>

pregnancy and/or during pregnancy were more likely to quit EC use during pregnancy (Table 3).

Quitting EC use was associated with a significantly reduced risk of low birth weight (aRR: 0.76, 95%CI: 0.62, 0.94) and SGA (aRR: 0.77, 95%CI: 0.62, 0.94), in both univariate and adjusted analyses. The significantly reduced risk of preterm birth became non-significant after adjusting for covariates (aRR: 0.89, 95%CI: 0.71, 1.11) (Fig 4). In the subset of 34.6% women who did not use CCs both before and during pregnancy, quitting EC use was associated with a significantly reduced risk of preterm birth (aRR: 0.68, 95%CI: 0.48, 0.98) and low birth weight (aRR: 0.60, 95%CI: 0.42, 0.84), but not SGA (aRR: 0.81, 95%CI: 0.54, 1.23) (Fig 4).

There were 32,519 (17.1%) and 1,223 (15.5%) subjects missing one or more covariates in the two study populations respectively (S3 and S4 Tables). Household income was the most common variable missing, with a weighted 8.63% and 6.74% subjects having missing household income respectively in the two study populations. Multiple imputation analyses showed consistent results (S3–S7 Figs).

## Discussion

Our large surveillance study of pregnant women who had live singleton births in 2016–2020 yielded several important findings regarding EC use during pregnancy that could inform public health policy. EC use during the last three months of pregnancy is not common among pregnant individuals. Of the 1.2% women who self-reported using ECs during the last three months of pregnancy, 43.9% used ECs only and 56.1% dual used ECs and CCs. The low EC use is partially because the majority of the women EC users quit EC use when they become pregnant. EC only use is associated with an increased risk of preterm birth and low birth weight, but not SGA. Dual use is associated with an increased risk of preterm birth, low birth weight, and SGA. The association between EC only use and low birth weight becomes non-significant when additionally adjusting for gestational age and in the term birth population, while the risk of dual use on these birth outcomes remains significant. At the same time, quitting EC use during pregnancy is associated with a significantly reduced risk of these adverse birth outcomes.

Our results confirm and expand upon previous reports of the association between pregnancy EC use and poor birth outcomes and provide an explanation for inconsistencies in findings among prior studies [24–30]. Animal studies have shown that prenatal EC exposure

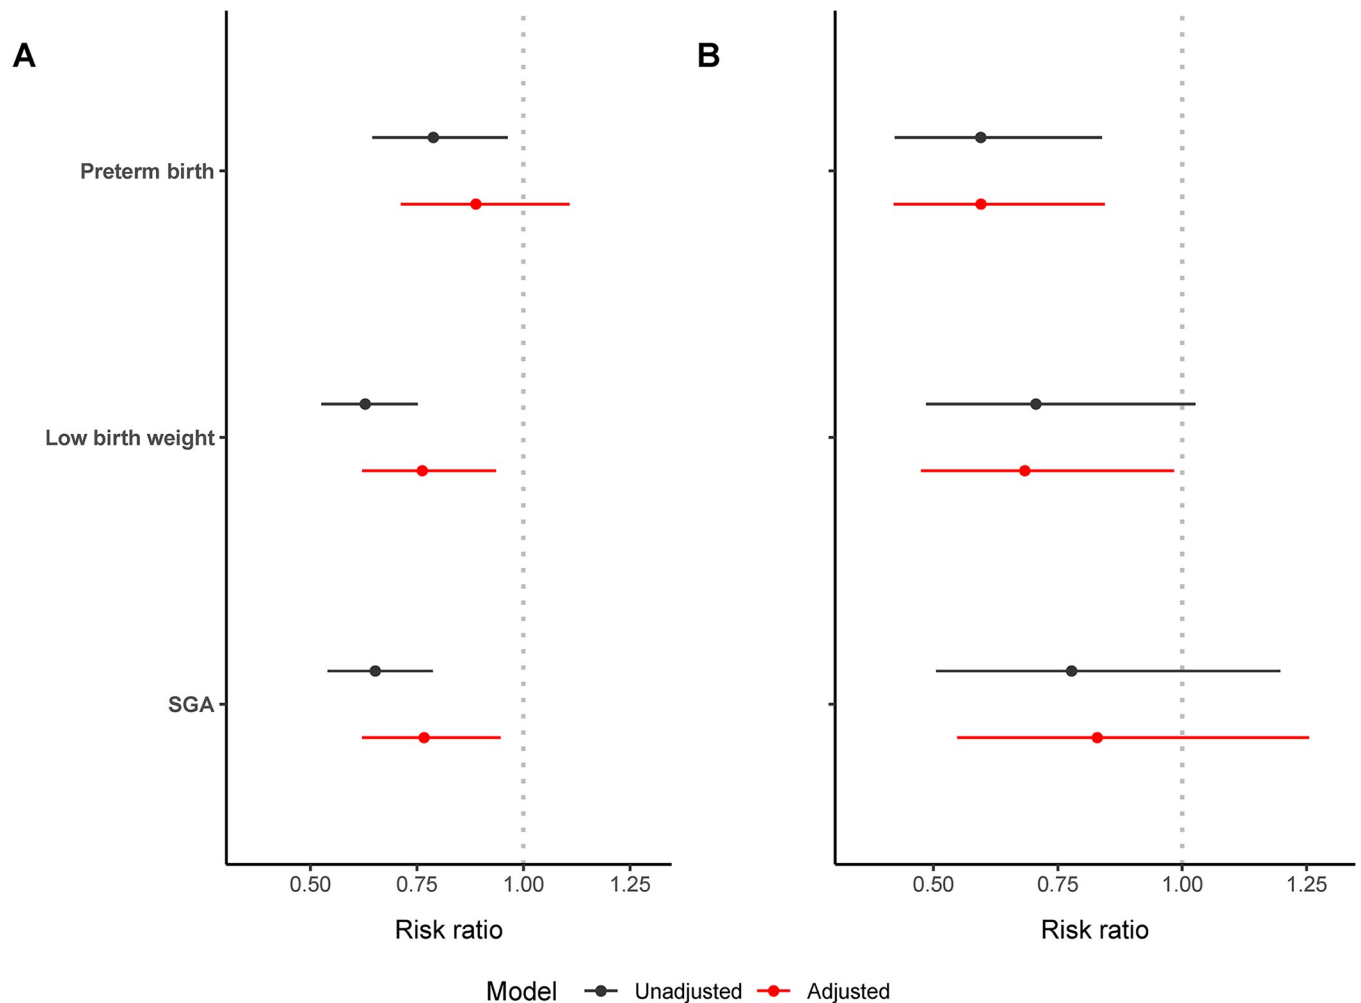

**Fig 4. Risk of preterm birth, low birth weight and SGA comparing women who quit EC use during pregnancy to those who continued EC use in the population of women.** (A) who all used EC prior to pregnancy and (B) the subset of EC only users (no use of CCs both before and during pregnancy). The multivariable modified Poisson regression was adjusted for maternal age at delivery, maternal race/ethnicity, maternal education, marital status, household income, prenatal federal nutritional assistance, pregnancy intention, the Kotelchuck index, initiation of prenatal care in the first trimester, pre-pregnancy multivitamin use, pre-pregnancy alcoholic drinking frequency, parity, history of preterm birth, maternal pre-pregnancy BMI, delivery method, maternal residency, and year of delivery. Number of CCs used before and during pregnancy was additionally adjusted in the overall population of women EC users (A).

<https://doi.org/10.1371/journal.pone.0287348.g004>

impacts fetal growth. Chronic exposure to EC aerosols containing nicotine during pregnancy has deleterious health effects on the offspring, leading to reduction in offspring weight and crown-rump length at birth and days after birth [31]. In humans, studies have reported inconsistent results ranging from a significantly increased risk to no association with preterm birth, low birth weight, and/or SGA [24–30]. Our results suggest a possible explanation for the previously reported inconsistent findings. Specifically, we found that EC only use is associated with preterm birth and it is potentially through increasing the risk of preterm birth that we see an increase in the risk of low birth weight, as the association with low birth weight is no longer apparent after adjustment for gestational age or when analysis is restricted to term births. Further, we observed no association between EC only use and SGA, a measure representing children's birth weight relative to their gestational age. Similar findings were reported in a prospective cohort of 620 live singleton births in Ireland [29]. When all infants were term births, EC only use, determined in the 10–14 weeks of pregnancy, was not associated with



birth weight or SGA compared to non-use. The potential harm of EC only use during pregnancy on adverse birth outcomes is reinforced by our result of a reduced risk found by comparing women who quit use with those who continued its use.

Our finding of a significantly increased risk of dual use of ECs and CCs on the risk of preterm birth, low birth weight, and SGA is consistent with prior scholarship [24, 26, 29, 30]. Women dual users have a similar risk compared to the CC only users who are well-established to have an increased risk of adverse birth outcomes, suggesting that CCs may be a unique and profound driver of adverse birth outcomes relative to ECs, directly affecting intrauterine fetal growth.

Biological mechanisms for adverse pregnancy-related outcomes following prenatal EC use are relatively unknown, as are the mechanisms driving the difference in findings between ECs and CCs. E-liquids and the products (e.g., aldehydes) formed during the heating process can both contribute to the increased risk [32]. Animal studies have shown that exposure to EC aerosols containing nicotine during pregnancy reduces blood flow in both the maternal uterine artery and fetal umbilical cord, which could result in both intrauterine growth restriction and preterm birth [33]. Ingredients other than nicotine have also been shown to hinder the function of trophoblasts in the placenta and lead to complications in placental structuring [17, 18]. Such placental changes could contribute to later increased risk of preeclampsia, early miscarriage, premature birth and even maternal or fetal death, but do not fully explain the differences in effect of ECs compared with CCs.

A unique contribution is the finding that quitting EC use during pregnancy is associated with reduced risk of adverse birth outcomes, a result consistent with the beneficial effect of quitting smoking. To date, ECs are classified as a tobacco product and no ECs have been approved as a smoking cessation aid in the pregnant women population. A recent Cochrane review concludes that nicotine-containing ECs are effective for smoking cessation [16]. Our finding that ECs may be harmful during pregnancy and quitting reduces the harm, in combination with prior scholarship, reinforce current public health advising against the use of ECs during pregnancy. Pregnant women smokers should be cautious when considering ECs as a viable smoking cessation strategy, and those EC users should be encouraged to quit EC use.

The strengths of this study includes the large study population of the PRAMS data which represents approximately 81% of live births in the United States and across five years of births [19]. PRAMS data are linked to the birth certificate, allowing the extraction of outcomes and covariates of interest which have been demonstrated to be accurate in previous studies [34, 35]. Despite these strengths, this study also has several limitations inherent to most retrospective secondary data analyses. First, our study is limited to women with live births. EC use may affect fetal survival and thus bias the association towards the null. Second, we relied on self-reported EC and CC use in the last three months of pregnancy, which as past studies suggest, is fairly accurate and representative of an individual's smoking pattern in pregnancy [36–39]. We assumed that EC users quit using ECs during pregnancy if they reported no use in the last three months of pregnancy. It is plausible the women EC users continued using ECs early in pregnancy although such misclassification will drive the quitting effect toward the null. Third, the PRAMS questionnaire aggregated usage of multiple types of e-cigarette products. It is thus not possible to differentiate specific effect of different types of ECs. Studies have shown that types of device (pods vs tanks, coil type, device power output setting) and choice of e-liquid (nicotine-containing versus nicotine-free e-cigarettes, flavoring agents and chemicals) affect a user's vaping topography and the amount of nicotine and other chemicals a person inhales [40–42]. Some devices therefore have higher addiction potential and thus, may be more difficult to quit using. Most pod type devices contain nicotine in salt form that may be more potent and thus, affect birth outcomes. Future studies that collect device information and directly

measure nicotine and chemicals pregnant women inhale will help address product specific effect of ECs on preterm birth and low birth weight. We determined preterm birth based on a woman's gestational age regardless of the type of preterm birth. We could not differentiate spontaneous preterm birth from medically indicated preterm birth of which preeclampsia is the leading cause [43]. It is plausible that the effect of EC use on preterm birth differs by the type of preterm birth; however, this could not be differentiated in this study. Lastly, given the observational and cross-sectional nature of the PRAMS survey, causal conclusions between EC use and adverse outcomes cannot be ascertained. Future studies that prospectively follow women regarding their pregnancy EC use and pregnancy outcomes may allow the establishment of causal inference.

## Conclusion

In this large surveillance survey study of U.S. pregnant women, EC use in pregnancy, by itself or dual use with CC, is associated with an increased risk of preterm birth. Through increasing the risk of preterm birth, EC use increases the risk of low birth weight. Quitting EC use reduces the risk. Pregnant women or those planning to become pregnant who smoke and consider ECs as a healthier alternative and/or as a smoking cessation tool should take into account the potential adverse effect of ECs. Pregnant EC users should be advised for quitting EC use.

## Supporting information

### **S1 Checklist. STROBE statement—checklist of items that should be included in reports of cross-sectional studies.**

(DOC)

**S1 Fig.** Odds of (A) preterm birth and (B) low birth weight as categorical variables comparing women EC only use, CC only use, and dual use during pregnancy to women who were non-users. Numbers presented are unweighted sample sizes in each group. The multivariable proportional odds ratio model (red) was adjusted for maternal age at delivery, maternal race/ethnicity, maternal education, marital status, household income, prenatal federal nutritional assistance, pregnancy intention, the Kotelchuck index, initiation of prenatal care in the first trimester, pre-pregnancy multivitamin use, pre-pregnancy alcoholic drinking frequency, parity, history of preterm birth, maternal pre-pregnancy BMI, maternal residency, and year of delivery.

(TIF)

**S2 Fig. Risk of low birth weight comparing women of EC only use, CC only use, and dual use during pregnancy to women who were non-users.** Numbers presented are unweighted sample sizes in each group. The multivariable modified Poisson regression (red) was adjusted for maternal age at delivery, maternal race/ethnicity, maternal education, marital status, household income, prenatal federal nutritional assistance, pregnancy intention, the Kotelchuck index, initiation of prenatal care in the first trimester, pre-pregnancy multivitamin use, pre-pregnancy alcoholic drinking frequency, parity, history of preterm birth, maternal pre-pregnancy BMI, maternal residency, and year of delivery. A second multivariable model was additionally adjusted for gestational age (purple).

(TIF)

**S3 Fig.** Risk of (A) preterm birth, (B) low birth weight, and (C) SGA comparing women of EC only use, CC only use, and dual use during pregnancy to women who were non-users. Numbers presented are unweighted sample sizes in each group. The multivariable modified Poisson regression (red) was performed with multiple imputation for missing covariates. The

covariates included maternal age at delivery, maternal race/ethnicity, maternal education, marital status, household income, prenatal federal nutritional assistance, pregnancy intention, the Kotelchuck index, initiation of prenatal care in the first trimester, pre-pregnancy multivitamin use, pre-pregnancy alcoholic drinking frequency, parity, history of preterm birth, maternal pre-pregnancy BMI, maternal residency, and year of delivery.  
(TIF)

**S4 Fig.** Odds of (A) preterm birth and (B) low birth weight as categorical variables comparing women EC only use, CC only use, and dual use during pregnancy to women who were non-users. Numbers presented are unweighted sample sizes in each group. The multivariable proportional odds ratio model (red) was performed with multiple imputation for missing covariates. The covariates included maternal age at delivery, maternal race/ethnicity, maternal education, marital status, household income, prenatal federal nutritional assistance, pregnancy intention, the Kotelchuck index, initiation of prenatal care in the first trimester, pre-pregnancy multivitamin use, pre-pregnancy alcoholic drinking frequency, parity, history of preterm birth, maternal pre-pregnancy BMI, maternal residency, and year of delivery.  
(TIF)

**S5 Fig. Risk of low birth weight comparing women of EC only use, CC only use, and dual use during pregnancy to women who were non-users.** Numbers presented are unweighted sample sizes in each group. The multivariable modified Poisson regression (red) was performed with multiple imputation for missing covariates. The covariates included maternal age at delivery, maternal race/ethnicity, maternal education, marital status, household income, prenatal federal nutritional assistance, pregnancy intention, the Kotelchuck index, initiation of prenatal care in the first trimester, pre-pregnancy multivitamin use, pre-pregnancy alcoholic drinking frequency, parity, history of preterm birth, maternal pre-pregnancy BMI, maternal residency, and year of delivery. A second multivariable model additionally adjusted for gestational age (purple).  
(TIF)

**S6 Fig. Risk of low birth weight comparing women of EC only use, CC only use, and dual use during pregnancy to women who were non-users in a subset of women who had had term birth babies ( $\geq 37$  weeks).** Numbers presented are unweighted sample sizes in each group. The multivariable modified Poisson regression (red) was performed with multiple imputation for missing covariates. The covariates included maternal age at delivery, maternal race/ethnicity, maternal education, marital status, household income, prenatal federal nutritional assistance, pregnancy intention, the Kotelchuck index, initiation of prenatal care in the first trimester, pre-pregnancy multivitamin use, pre-pregnancy alcoholic drinking frequency, parity, history of preterm birth, maternal pre-pregnancy BMI, delivery method, maternal residency, and year of delivery.  
(TIF)

**S7 Fig.** Risk of preterm birth, low birth weight and SGA comparing women who quit EC use during pregnancy to those who continued EC use in the population of women (A) who all used EC prior to pregnancy and (B) the subset of EC only users (no use of CCs both before and during pregnancy). The multivariable modified Poisson regression was performed with multiple imputation for missing covariates. The covariates included maternal age at delivery, maternal race/ethnicity, maternal education, marital status, household income, prenatal federal nutritional assistance, pregnancy intention, the Kotelchuck index, initiation of prenatal care in the first trimester, pre-pregnancy multivitamin use, pre-pregnancy alcoholic drinking frequency, parity, history of preterm birth, maternal pre-pregnancy BMI, delivery method,

maternal residency, and year of delivery. Number of CCs used before and during pregnancy was additionally adjusted in the overall population of women EC users (A).  
(TIF)

**S1 Table. Participating sites meeting minimum response rate thresholds and providing data for this study by year, PRAMS, 2016–2020.**

(DOCX)

**S2 Table. Measurement of cigarette use in the PRAMS Survey, 2016–2020.**

(DOCX)

**S3 Table. Frequency and proportion of subjects missing in one or more covariates in the population of women who gave live singleton births in 2016–2020, PRAMS.**

(DOCX)

**S4 Table. Frequency and proportion of subjects missing in one or more covariates in the population of women who all used ECs prior to pregnancy and gave live singleton births in 2016–2020, PRAMS.**

(DOCX)

## Acknowledgments

We are indebted to the PRAMS Working Group and the Centers for Disease Control and Prevention for providing the data.

## Author Contributions

**Conceptualization:** Lin Ammar, Hilary A. Tindle, Angela M. Miller, Margaret A. Adgent, Kelli K. Ryckman, Tina V. Hartert, Pingsheng Wu.

**Data curation:** Lin Ammar, Hui Nian.

**Formal analysis:** Lin Ammar, Hui Nian, Ethan Xie.

**Funding acquisition:** Pingsheng Wu.

**Software:** Hui Nian.

**Supervision:** Pingsheng Wu.

**Visualization:** Hui Nian.

**Writing – original draft:** Lin Ammar, Pingsheng Wu.

**Writing – review & editing:** Hilary A. Tindle, Angela M. Miller, Margaret A. Adgent, Hui Nian, Kelli K. Ryckman, Mulubrhan Mogos, Mariann R. Piano, Ethan Xie, Brittney M. Snyder, Abhismitha Ramesh, Chang Yu, Tina V. Hartert, Pingsheng Wu.

## References

1. Centers for Disease Control and Prevention. Birthweight and Gestation 2022 [July 21,2022]. Available from: <https://www.cdc.gov/nchs/fastats/birthweight.htm>.
2. Goldenberg RL, Culhane JF. Low birth weight in the United States. *Am J Clin Nutr*. 2007; 85(2):584S–90S. Epub 2007/02/08. <https://doi.org/10.1093/ajcn/85.2.584S> PMID: 17284760.
3. Petrou S. Economic consequences of preterm birth and low birthweight. *BJOG*. 2003; 110 Suppl 20:17–23. Epub 2003/05/24. PMID: 12763106.
4. Hoyert DL, Freedman MA, Strobino DM, Guyer B. Annual summary of vital statistics: 2000. *Pediatrics*. 2001; 108(6):1241–55. Epub 2001/12/04. <https://doi.org/10.1542/peds.108.6.1241> PMID: 11731644.

5. U.S. Department of Health and Human Services. Smoking Cessation: A Report of the Surgeon General. Atlanta, GA: U. S. Department of Health and Human Services, Centers for Disease Control and Prevention, National Center for Chronic Disease Prevention and Health Promotion, Office on Smoking and Health, 2020.
6. Jaddoe VW, Troe EJ, Hofman A, Mackenbach JP, Moll HA, Steegers EA, et al. Active and passive maternal smoking during pregnancy and the risks of low birthweight and preterm birth: the Generation R Study. *Paediatr Perinat Epidemiol*. 2008; 22(2):162–71. Epub 2008/02/27. <https://doi.org/10.1111/j.1365-3016.2007.00916.x> PMID: 18298691.
7. Abel EL. Smoking during pregnancy: a review of effects on growth and development of offspring. *Hum Biol*. 1980; 52(4):593–625. Epub 1980/12/01. PMID: 7009384.
8. Force USPST Krist AH, Davidson KW Mangione CM, Barry MJ, Cabana M, et al. Interventions for Tobacco Smoking Cessation in Adults, Including Pregnant Persons: US Preventive Services Task Force Recommendation Statement. *JAMA*. 2021; 325(3):265–79. <https://doi.org/10.1001/jama.2020.25019> PMID: 33464343.
9. McCubbin A, Fallin-Bennett A, Barnett J, Ashford K. Perceptions and use of electronic cigarettes in pregnancy. *Health Educ Res*. 2017; 32(1):22–32. Epub 2017/02/06. <https://doi.org/10.1093/her/cyw059> PMID: 28158490; PubMed Central PMCID: PMC5914445.
10. Wagner NJ, Camerota M, Propper C. Prevalence and Perceptions of Electronic Cigarette Use during Pregnancy. *Matern Child Health J*. 2017; 21(8):1655–61. Epub 2017/01/14. <https://doi.org/10.1007/s10995-016-2257-9> PMID: 28084577; PubMed Central PMCID: PMC5509528.
11. Mark KS, Farquhar B, Chisolm MS, Coleman-Cowger VH, Terplan M. Knowledge, Attitudes, and Practice of Electronic Cigarette Use Among Pregnant Women. *J Addict Med*. 2015; 9(4):266–72. Epub 2015/05/15. <https://doi.org/10.1097/ADM.000000000000128> PMID: 25974378.
12. Bhandari NR, Day KD, Payakachat N, Franks AM, McCain KR, Ragland D. Use and Risk Perception of Electronic Nicotine Delivery Systems and Tobacco in Pregnancy. *Womens Health Issues*. 2018; 28(3):251–7. Epub 20180324. <https://doi.org/10.1016/j.whi.2018.02.005> PMID: 29588116.
13. England LJ, Tong VT, Koblitz A, Kish-Doto J, Lynch MM, Southwell BG. Perceptions of emerging tobacco products and nicotine replacement therapy among pregnant women and women planning a pregnancy. *Prev Med Rep*. 2016; 4:481–5. Epub 20160907. <https://doi.org/10.1016/j.pmedr.2016.09.002> PMID: 27635381; PubMed Central PMCID: PMC5024333.
14. Obisesan OH, Osei AD, Uddin SMI, Dzaye O, Cainzos-Achirica M, Mirbolouk M, et al. E-Cigarette Use Patterns and High-Risk Behaviors in Pregnancy: Behavioral Risk Factor Surveillance System, 2016–2018. *Am J Prev Med*. 2020; 59(2):187–95. Epub 2020/05/05. <https://doi.org/10.1016/j.amepre.2020.02.015> PMID: 32362509; PubMed Central PMCID: PMC8349302.
15. Administration USFD. E-Cigarettes, Vapes, and other Electronic Nicotine Delivery Systems (ENDS) [updated 06/29/2022; cited 2022 08/30]. Available from: <https://www.fda.gov/tobacco-products/products-ingredients-components/e-cigarettes-vapes-and-other-electronic-nicotine-delivery-systems-ends>.
16. Hartmann-Boyce J, Livingstone-Banks J, Ordonez-Mena JM, Fanshawe TR, Lindson N, Freeman SC, et al. Behavioural interventions for smoking cessation: an overview and network meta-analysis. *Cochrane Database Syst Rev*. 2021; 1:CD013229. Epub 20210104. <https://doi.org/10.1002/14651858.CD013229.pub2> PMID: 33411338.
17. Williams M, Villarreal A, Bozhilov K, Lin S, Talbot P. Metal and silicate particles including nanoparticles are present in electronic cigarette cartomizer fluid and aerosol. *PloS one*. 2013; 8(3):e57987. Epub 2013/03/26. <https://doi.org/10.1371/journal.pone.0057987> PMID: 23526962; PubMed Central PMCID: PMC3603976.
18. Raez-Villanueva S, Ma C, Kleiboer S, Holloway AC. The effects of electronic cigarette vapor on placental trophoblast cell function. *Reprod Toxicol*. 2018; 81:115–21. Epub 2018/07/27. <https://doi.org/10.1016/j.reprotox.2018.07.084> PMID: 30048688.
19. Centers for Disease Control and Prevention. PRAMS 2022 [June 6, 2022]. Available from: <https://www.cdc.gov/prams/index.htm>.
20. Shulman HB D'Angelo DV, Harrison L, Smith RA, Warner L. The Pregnancy Risk Assessment Monitoring System (PRAMS): Overview of Design and Methodology. *Am J Public Health*. 2018; 108(10):1305–13. Epub 2018/08/24. <https://doi.org/10.2105/AJPH.2018.304563> PMID: 30138070; PubMed Central PMCID: PMC6137777.
21. Harrell FE Jr. *Hmisc: Harrell Miscellaneous*. 2023.
22. Lumley T. *mitools: Tools for Multiple Imputation of Missing Data*. 2019.
23. R Core Team. *R: A language and environment for statistical computing*. Vienna, Austria: R Foundation for Statistical Computing; 2022.



24. Regan AK, Bombard JM, O'Hegarty MM, Smith RA, Tong VT. Adverse Birth Outcomes Associated With Prepregnancy and Prenatal Electronic Cigarette Use. *Obstet Gynecol.* 2021; 138(1):85–94. Epub 2021/07/15. <https://doi.org/10.1097/AOG.0000000000004432> PMID: 34259468.
25. Kim S, Oancea SC. Electronic cigarettes may not be a "safer alternative" of conventional cigarettes during pregnancy: evidence from the nationally representative PRAMS data. *BMC Pregnancy Childbirth.* 2020; 20(1):557. Epub 2020/09/25. <https://doi.org/10.1186/s12884-020-03247-6> PMID: 32967660; PubMed Central PMCID: PMC7510270.
26. Hawkins SS, Wylie BJ, Hacker MR. Associations between electronic nicotine delivery systems and birth outcomes. *J Matern Fetal Neonatal Med.* 2021:1–8. Epub 2021/05/26. <https://doi.org/10.1080/14767058.2021.1929156> PMID: 34030564.
27. Opondo C, Harrison S, Alderdice F, Carson C, Quigley MA. Electronic cigarette use (vaping) and patterns of tobacco cigarette smoking in pregnancy—evidence from a population-based maternity survey in England. *PLoS one.* 2021; 16(6):e0252817. Epub 2021/06/05. <https://doi.org/10.1371/journal.pone.0252817> PMID: 34086809; PubMed Central PMCID: PMC8177470.
28. Wang X, Lee NL, Burstyn I. Smoking and use of electronic cigarettes (vaping) in relation to preterm birth and small-for-gestational-age in a 2016 U.S. national sample. *Prev Med.* 2020; 134:106041. Epub 2020/02/28. <https://doi.org/10.1016/j.ypmed.2020.106041> PMID: 32105682.
29. McDonnell BP, Dicker P, Regan CL. Electronic cigarettes and obstetric outcomes: a prospective observational study. *BJOG.* 2020; 127(6):750–6. Epub 2020/02/10. <https://doi.org/10.1111/1471-0528.16110> PMID: 32036628.
30. Cardenas VM, Ali MM, Fischbach LA, Nembhard WN. Dual use of cigarettes and electronic nicotine delivery systems during pregnancy and the risk of small for gestational age neonates. *Ann Epidemiol.* 2020; 52:86–92 e2. Epub 2020/08/18. <https://doi.org/10.1016/j.annepidem.2020.08.002> PMID: 32805398.
31. Orzabal MR, Lunde-Young ER, Ramirez JI, Howe SYF, Naik VD, Lee J, et al. Chronic exposure to e-cig aerosols during early development causes vascular dysfunction and offspring growth deficits. *Transl Res.* 2019; 207:70–82. Epub 2019/01/07. <https://doi.org/10.1016/j.trsl.2019.01.001> PMID: 30653941; PubMed Central PMCID: PMC6486852.
32. National Academies of Sciences E, and Medicine; Health and Medicine Division; Board on Population Health and Public Health Practice; Committee on the Review of the Health Effects of Electronic Nicotine Delivery Systems. *Public Health Consequences of E-Cigarettes.* Washington (DC): National Academies Press (US); 2018.
33. Orzabal M, Ramadoss J. Impact of Electronic Cigarette Aerosols on Pregnancy and Early Development. *Curr Opin Toxicol.* 2019; 14:14–20. Epub 2019/06/20. <https://doi.org/10.1016/j.cotox.2019.05.001> PMID: 31214660; PubMed Central PMCID: PMC6581464.
34. Ziogas C, Hillyer J, Saftlas AF, Spracklen CN. Validation of birth certificate and maternal recall of events in labor and delivery with medical records in the Iowa health in pregnancy study. *BMC Pregnancy Childbirth.* 2022; 22(1):232. Epub 2022/03/22. <https://doi.org/10.1186/s12884-022-04581-7> PMID: 35317778; PubMed Central PMCID: PMC8939232.
35. Shenkin SD, Zhang MG, Der G, Mathur S, Mina TH, Reynolds RM. Validity of recalled v. recorded birth weight: a systematic review and meta-analysis. *J Dev Orig Health Dis.* 2017; 8(2):137–48. Epub 2016/10/25. <https://doi.org/10.1017/S2040174416000581> PMID: 27776565.
36. Kvalvik LG, Nilsen RM, Skjaerven R, Vollset SE, Midttun O, Ueland PM, et al. Self-reported smoking status and plasma cotinine concentrations among pregnant women in the Norwegian Mother and Child Cohort Study. *Pediatr Res.* 2012; 72(1):101–7. Epub 2012/03/22. <https://doi.org/10.1038/pr.2012.36> PMID: 22441375; PubMed Central PMCID: PMC3630336.
37. Mattsson K, Kallen K, Rignell-Hydbom A, Lindh CH, Jonsson BA, Gustafsson P, et al. Cotinine Validation of Self-Reported Smoking During Pregnancy in the Swedish Medical Birth Register. *Nicotine Tob Res.* 2016; 18(1):79–83. Epub 2015/04/20. <https://doi.org/10.1093/ntr/ntv087> PMID: 25895950.
38. Addicott MA, Sutfin EL, Reynolds LM, Donny EC, Matich EK, Hsu PC. Biochemical validation of self-reported electronic nicotine delivery system and tobacco heaviness of use. *Exp Clin Psychopharmacol.* 2022. Epub 2022/09/15. <https://doi.org/10.1037/pha0000604> PMID: 36107700.
39. Boykan R, Messina CR, Chateau G, Eliscu A, Tolentino J, Goniewicz ML. Self-Reported Use of Tobacco, E-cigarettes, and Marijuana Versus Urinary Biomarkers. *Pediatrics.* 2019; 143(5). <https://doi.org/10.1542/peds.2018-3531> PMID: 31010908.
40. Son Y, Wackowski O, Weisel C, Schwander S, Mainelis G, Delnevo C, et al. Evaluation of E-Vapor Nicotine and Nicotyrine Concentrations under Various E-Liquid Compositions, Device Settings, and Vaping Topographies. *Chem Res Toxicol.* 2018; 31(9):861–8. Epub 2018/08/21. <https://doi.org/10.1021/acs.chemrestox.8b00063> PMID: 30080399; PubMed Central PMCID: PMC6350771.



41. Son Y, Weisel C, Wackowski O, Schwander S, Delnevo C, Meng Q. The Impact of Device Settings, Use Patterns, and Flavorings on Carbonyl Emissions from Electronic Cigarettes. *Int J Environ Res Public Health*. 2020; 17(16). Epub 20200805. <https://doi.org/10.3390/ijerph17165650> PMID: 32764435; PubMed Central PMCID: PMC7460324.
42. Talih S, Balhas Z, Eissenberg T, Salman R, Karaoghlanian N, El Hellani A, et al. Effects of user puff topography, device voltage, and liquid nicotine concentration on electronic cigarette nicotine yield: measurements and model predictions. *Nicotine Tob Res*. 2015; 17(2):150–7. Epub 20140903. <https://doi.org/10.1093/ntr/ntu174> PMID: 25187061; PubMed Central PMCID: PMC4837998.
43. Goldenberg RL, Culhane JF, Iams JD, Romero R. Epidemiology and causes of preterm birth. *Lancet*. 2008; 371(9606):75–84. [https://doi.org/10.1016/S0140-6736\(08\)60074-4](https://doi.org/10.1016/S0140-6736(08)60074-4) PMID: 18177778; PubMed Central PMCID: PMC7134569.
